# Supplementary material
Source: PubMed Central journal article supplement (PMC7989030)

## *Supporting Information*

### **Discovery of Orally Bioavailable Chromone Derivatives as Potent and Selective BRD4**

#### **Inhibitors: Scaffolding Hopping, Optimization and Pharmacological Evaluation**

Zhiqing Liu,<sup>†</sup> Haiying Chen,<sup>†</sup> Pingyuan Wang,<sup>†</sup> Yi Li,<sup>†</sup> Eric A. Wold,<sup>†</sup> Paul G. Leonard,<sup>‡</sup> Sarah

Joseph,<sup>‡</sup> Allan R. Brasier,<sup>||,\*</sup> Bing Tian,<sup>‡,§,\*</sup> and Jia Zhou<sup>†,§,ξ,\*</sup>

<sup>†</sup>Chemical Biology Program, Department of Pharmacology and Toxicology, <sup>‡</sup>Department of Internal Medicine, <sup>§</sup>Sealy Center for Molecular Medicine, <sup>ξ</sup>Institute for Translational Sciences,

University of Texas Medical Branch, Galveston, TX 77555, USA

<sup>‡</sup>Core for Biomolecular Structure and Function, MD Anderson Cancer Center, 1881 East Road,

Houston, TX, 77054, USA

<sup>||</sup>Institute for Clinical and Translational Research (ICTR), University of Wisconsin-Madison

School of Medicine and Public Health, 4248 Health Sciences Learning Center, Madison, WI

53705, USA

**\*Corresponding authors:** Dr. Jia Zhou, Chemical Biology Program, Department of Pharmacology and Toxicology, University of Texas Medical Branch, Galveston, Texas 77555, United States. Tel: +1 (409) 772-9748; E-mail: [jizhou@utmb.edu](mailto:jizhou@utmb.edu). Dr. Bing Tian, Tel: +1 (409) 772-1177; E-mail: [bitian@utmb.edu](mailto:bitian@utmb.edu). Dr. Allan R. Brasier, Tel: +1 (608) 263-7371; E-mail: [abrasier@wisc.edu](mailto:abrasier@wisc.edu).

## Table of Contents

|                                                    |     |
|----------------------------------------------------|-----|
| Figure S1                                          | S3  |
| Figure S2                                          | S5  |
| Figure S3                                          | S6  |
| Table S1                                           | S7  |
| Table S2                                           | S8  |
| Table S3                                           | S10 |
| Copies of representative HPLC                      | S12 |
| Copies of $^1\text{H}$ NMR and $^{13}\text{C}$ NMR | S16 |

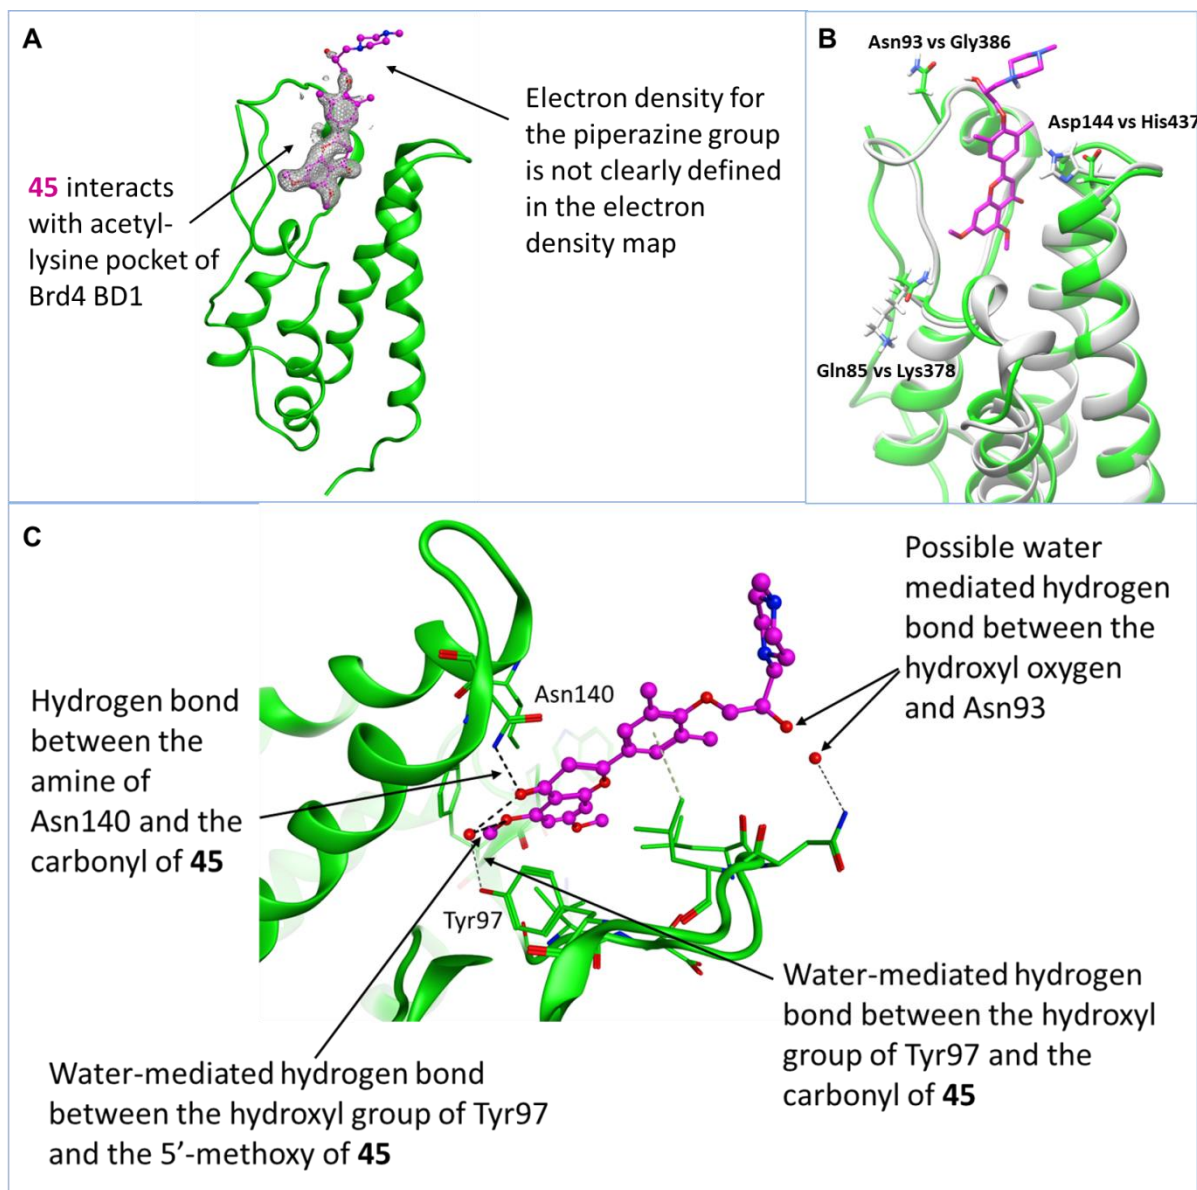

Figure S1. A) Crystal structure of **45** with BRD4 BD1 as ribbon diagram. Compound **45** occupying the Acetyl-lysine pocket of the bromodomain is shown with the ball and stick representation. The binding mode of **45** is unambiguously defined by the electron density in the crystal structure for the 5,7-dimethoxy-2-(3-methylphenyl)-4*H*-chromen-4-one part of the compound but the piperazine region is not clearly defined by the electron density suggesting this region adopts multiple conformations. The unbiased omit FoFcWT map for the compound, contoured at  $3\sigma$  is

shown as a grey mesh. Compound **45** (pink) is depicted using ball and stick representation. B) Overlay and comparison of BRD4 BD1 (in green) and BRD4 BD2 (light gray, PDB code: 6C7Q). Different residues (Asn93 vs Gly386, Gln85 vs Lys378 and Asp144 vs His437) around the binding pocket are highlighted. C) Interaction network for **45** interacting with BRD4 BD1.

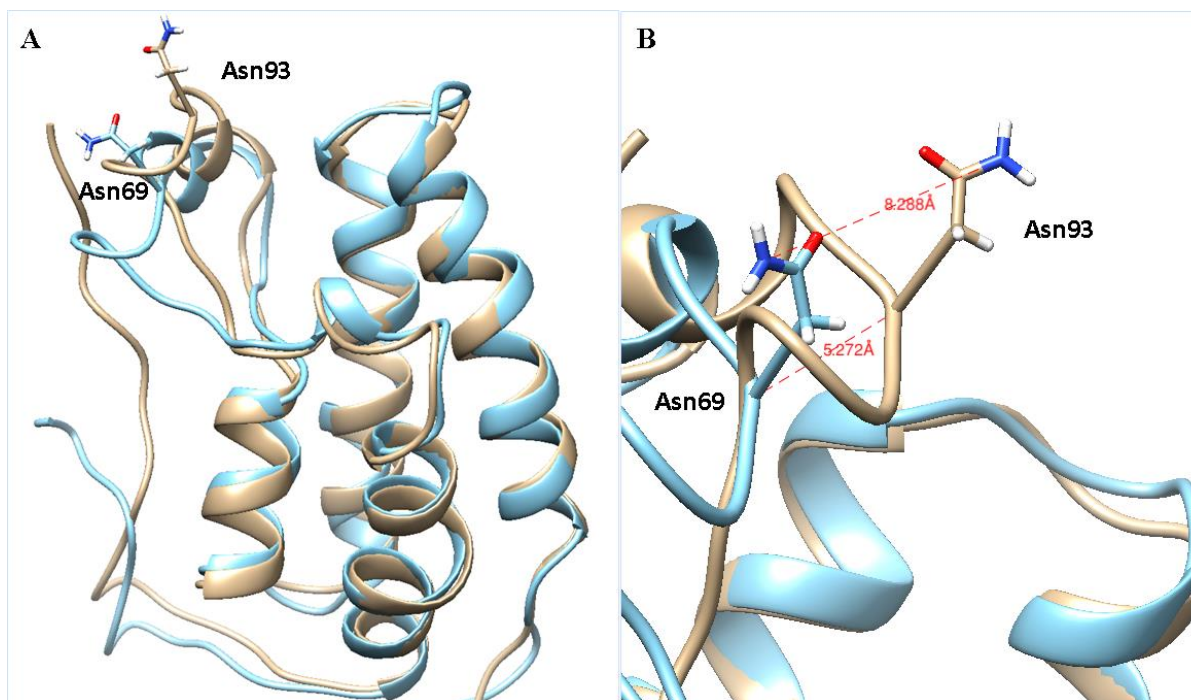

Figure S2. Superimposition of BRD4 BD1 (in tan, PDB code: 4MR4) and BRD3 BD1 (in light blue, PDB code: 2L5E). A) The helices of BRD4 BD1 and BRD3 BD1 are overlaid very well, while the loops especially ZA loop are far away from each other. B) The distances between the equivalent residues Asn93 and Asn69 were provided to highlight the ZA loop shift.

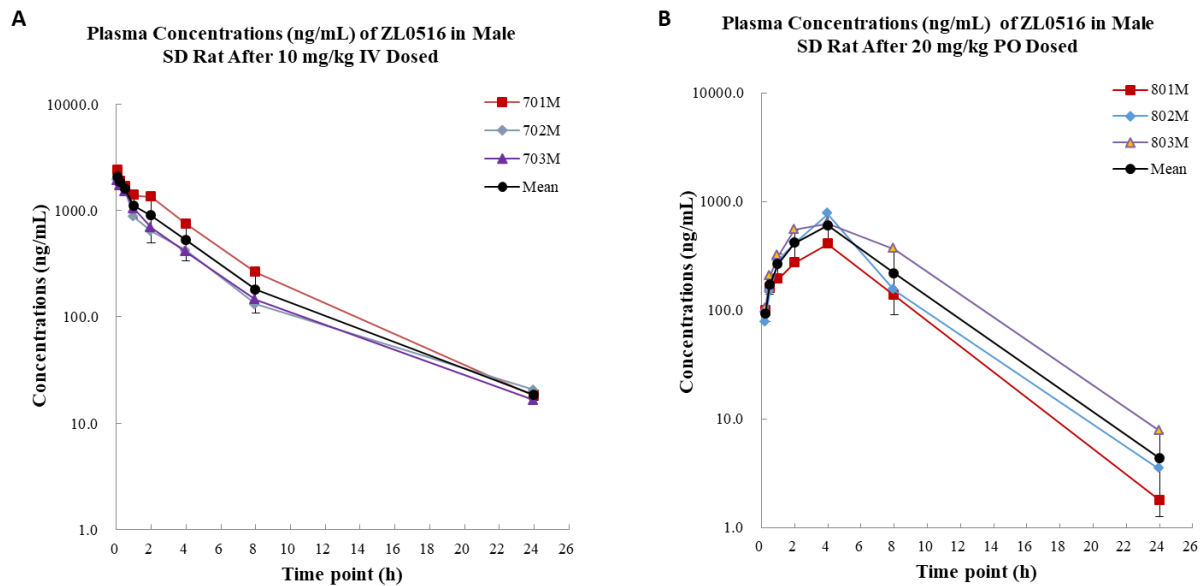

Figure S3. Plasma concentration curves of compound **45** in male SD rats after either IV or PO administration.

**Table S1. BROMOscan™ Profiling of Compound 45.**

| Targets  | Inhibition (%) @10 $\mu$ M <sup>a</sup> |
|----------|-----------------------------------------|
| ATAD2A   | 8                                       |
| BAZ2A    | 7                                       |
| BRD1     | 42                                      |
| CECR2    | 38                                      |
| CREBBP   | 4                                       |
| EP300    | 11                                      |
| PCAF     | 64                                      |
| SMARCA4  | 0                                       |
| TAF1L(2) | 29                                      |

<sup>a</sup>The compound(s) were screened at the concentration(s) requested, and results for primary screen binding interactions are reported as inhibitory rate (%) by calculating with '1-%Ctrl', where lower numbers indicate weaker hits in the matrix.

Assay principle: <https://www.discoverx.com/technologies-platforms/competitive-binding-technology/bromoscan-technology-platform>.

**Table S2. NIMH Psychoactive Drug Screening Program (PDSP) for Compound 45.**

| Targets            | Inhibition (%) @10 $\mu$ M <sup>a</sup> |
|--------------------|-----------------------------------------|
| 5-HT1A             | 3.6                                     |
| 5-HT1B             | 47.3                                    |
| 5-HT1D             | -1.1                                    |
| 5-HT1E             | 4.9                                     |
| 5-HT2A             | 19.5                                    |
| 5-HT2B             | 64.7                                    |
| 5-HT2C             | 40                                      |
| 5-HT3              | 3.7                                     |
| 5-HT5A             | 14.1                                    |
| 5-HT6              | -3.8                                    |
| 5-HT7              | 6.6                                     |
| Alpha1A            | -6.8                                    |
| Alpha1B            | 33.4                                    |
| Alpha1D            | 1.9                                     |
| Alpha2A            | 36.2                                    |
| Alpha2B            | 29.7                                    |
| Alpha2C            | 17.3                                    |
| Beta1              | -2.5                                    |
| Beta2              | 1.5                                     |
| Beta3              | 37.8                                    |
| BZP Rat Brain Site | 39.7                                    |



|       |      |
|-------|------|
| D1    | 15.0 |
| D2    | -6.3 |
| D3    | -8.4 |
| D4    | 12.0 |
| D5    | 27.6 |
| DAT   | 19.2 |
| DOR   | -3.3 |
| H2    | 40.0 |
| H4    | -0.2 |
| KOR   | -6.1 |
| M1    | 23.7 |
| M2    | 9.7  |
| M3    | 9.8  |
| M4    | 9.4  |
| M5    | 43.2 |
| MOR   | 25.8 |
| NET   | 17.9 |
| PBR   | 24.9 |
| SERT  | 25.4 |
| Sigma | 69.3 |

---

<sup>a</sup>Data represent mean % inhibition (N = 4 determinations) for compound tested at receptor subtypes.

Significant inhibition is considered > 50%. In cases where negative inhibition (-) is seen, this represents a stimulation of binding.

**Table S3. Data Collection and Refinement Statistics for the Crystal Analysis of BRD4 Inhibitor 45 Co-complexed with Human BRD4 BD1.**

|                                | Brd4_BD1: 45                                   |
|--------------------------------|------------------------------------------------|
| Wavelength (nm)                | 1.541                                          |
| Resolution range (Å)           | 26.87 - 2.0 (2.072 - 2.000)                    |
| Space group                    | P 2 <sub>1</sub> 2 <sub>1</sub> 2 <sub>1</sub> |
| Unit cell                      | 37.0037 44.4639 78.1768 90 90 90               |
| Total reflections              | 69104 (5312)                                   |
| Unique reflections             | 9130 (844)                                     |
| Multiplicity                   | 7.6 (6.3)                                      |
| Completeness (%)               | 99.40 (94.73)                                  |
| Mean I/sigma(I)                | 7.06 (2.10)                                    |
| Wilson B-factor                | 15.39                                          |
| R-merge                        | 0.2234 (0.8107)                                |
| R-meas                         | 0.24 (0.8832)                                  |
| R-pim                          | 0.08587 (0.3397)                               |
| CC1/2                          | 0.99 (0.673)                                   |
| CC*                            | 0.997 (0.897)                                  |
| Reflections used in refinement | 9128 (845)                                     |
| Reflections used for R-free    | 912 (85)                                       |
| R-work                         | 0.1820 (0.2179)                                |
| R-free                         | 0.2590 (0.2901)                                |
| CC(work)                       | 0.959 (0.824)                                  |
| CC(free)                       | 0.907 (0.683)                                  |
| Number of non-hydrogen atoms   | 1269                                           |
| macromolecules                 | 1056                                           |
| ligands                        | 55                                             |
| solvent                        | 158                                            |
| Protein residues               | 126                                            |
| RMS(bonds)                     | 0.007                                          |
| RMS(angles)                    | 1.01                                           |

|                           |                 |
|---------------------------|-----------------|
| Ramachandran favored (%)  | 99.19           |
| Ramachandran allowed (%)  | 0.81            |
| Ramachandran outliers (%) | 0.00            |
| Rotamer outliers (%)      | 0.00            |
| Clashscore                | 5.02            |
| Average B-factor          | 16.94           |
| macromolecules            | 15.43           |
| ligands                   | 30.17           |
| solvent                   | 22.47           |
|                           | Brd4_BD1:ZL0516 |

\*Statistics for the highest-resolution shell are shown in parentheses.

Copies of representative HPLC

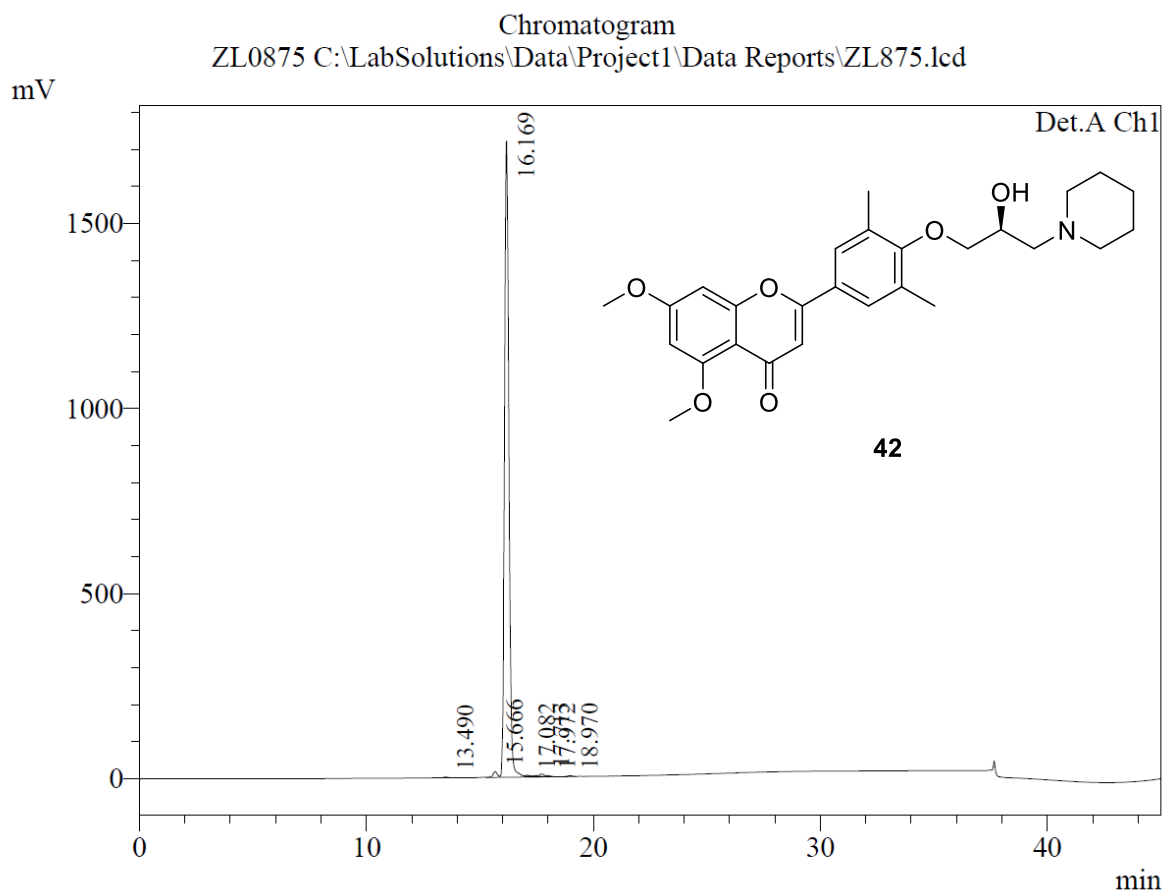

PeakTable

Detector A Ch1 254nm

| Peak# | Ret. Time | Area     | Area %  | Height % |
|-------|-----------|----------|---------|----------|
| 1     | 13.490    | 30679    | 0.129   | 0.138    |
| 2     | 15.666    | 211791   | 0.892   | 0.901    |
| 3     | 16.169    | 23299507 | 98.182  | 98.179   |
| 4     | 17.082    | 19131    | 0.081   | 0.119    |
| 5     | 17.713    | 103290   | 0.435   | 0.382    |
| 6     | 17.972    | 28171    | 0.119   | 0.138    |
| 7     | 18.970    | 38285    | 0.161   | 0.143    |
| Total |           | 23730853 | 100.000 | 100.000  |

Chromatogram  
 ZL0876 C:\LabSolutions\Data\Project1\Data Reports\ZL876.lcd

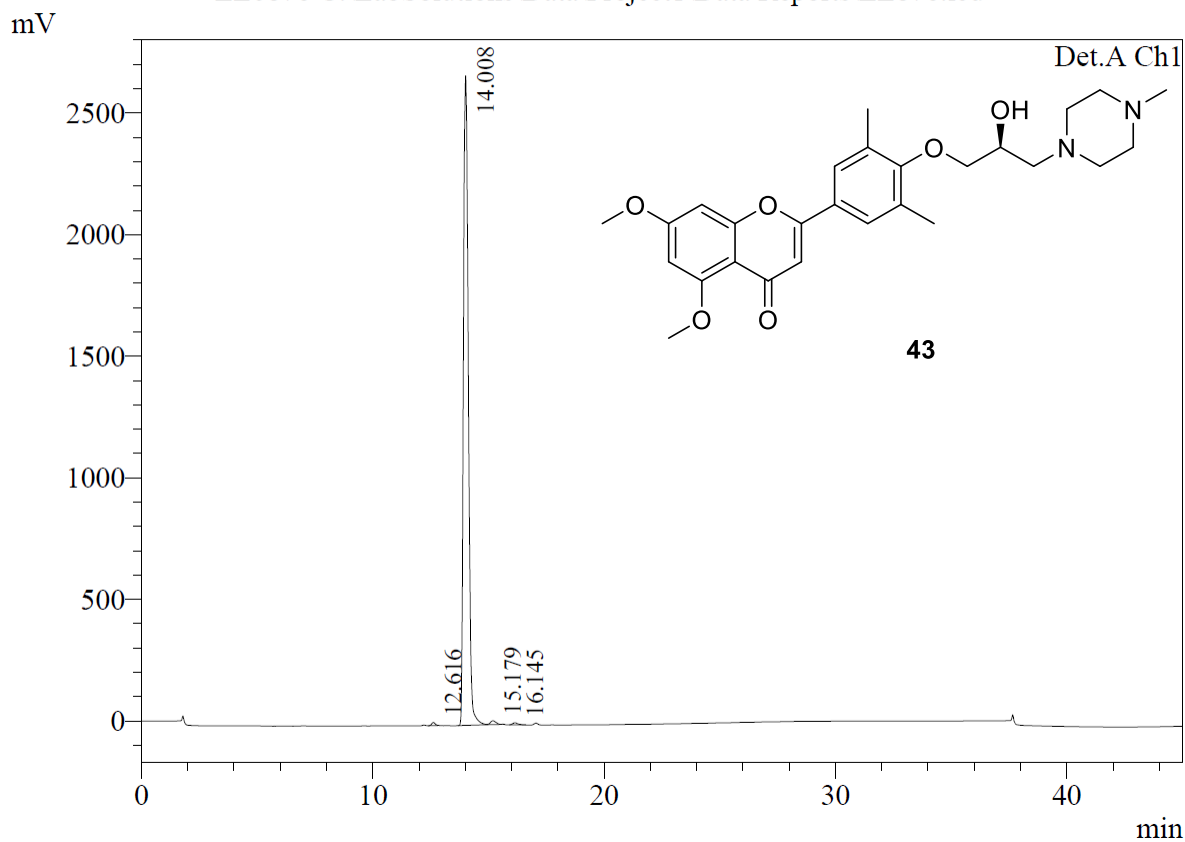

PeakTable

Detector A Ch1 254nm

| Peak# | Ret. Time | Area     | Area %  | Height % |
|-------|-----------|----------|---------|----------|
| 1     | 12.616    | 135711   | 0.340   | 0.472    |
| 2     | 14.008    | 39380087 | 98.630  | 98.613   |
| 3     | 15.179    | 268696   | 0.673   | 0.601    |
| 4     | 16.145    | 142411   | 0.357   | 0.315    |
| Total |           | 39926904 | 100.000 | 100.000  |

Chromatogram  
 ZL0513 C:\LabSolutions\Data\Project1\Data Reports\ZL0513\_2.lcd

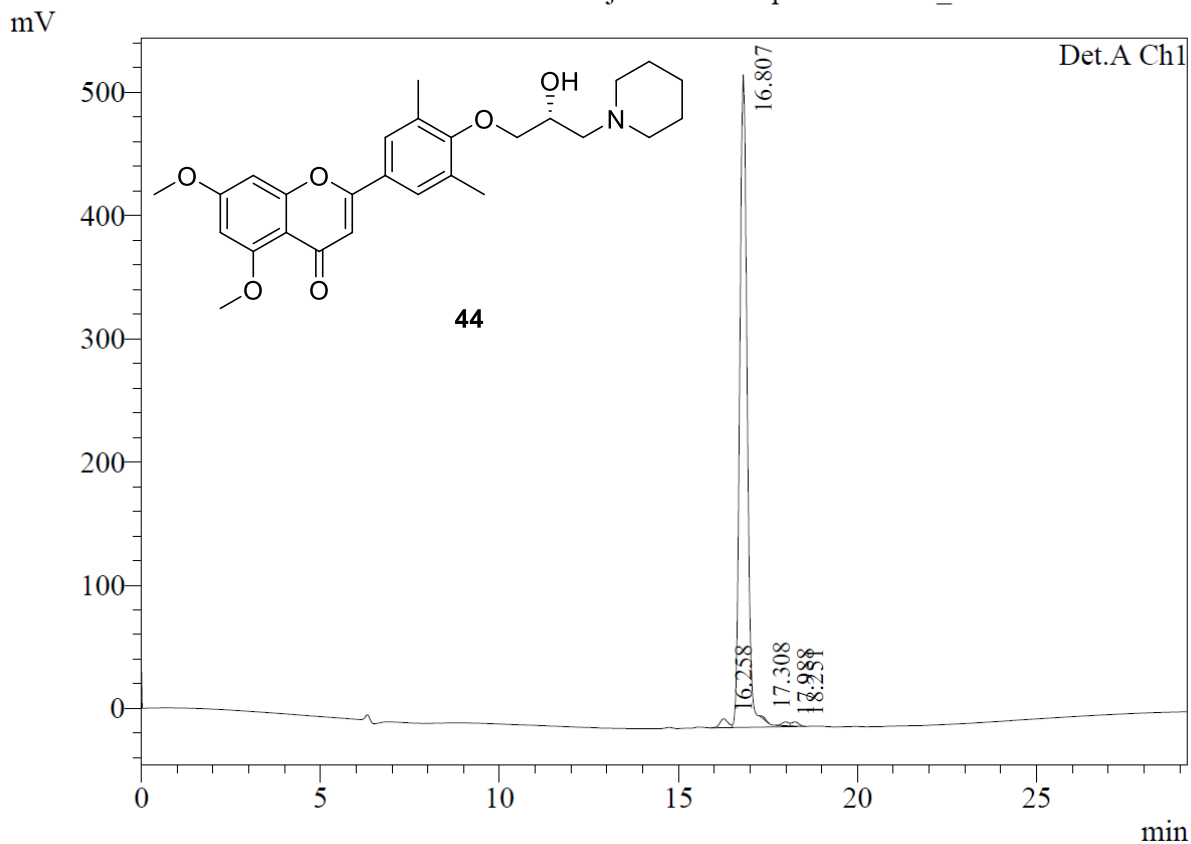

PeakTable

Detector A Ch1 254nm

| Peak# | Ret. Time | Area    | Area %  | Height % |
|-------|-----------|---------|---------|----------|
| 1     | 16.258    | 113599  | 1.425   | 1.324    |
| 2     | 16.807    | 7758250 | 97.294  | 97.285   |
| 3     | 17.308    | 14540   | 0.182   | 0.212    |
| 4     | 17.988    | 40701   | 0.510   | 0.563    |
| 5     | 18.251    | 46945   | 0.589   | 0.615    |
| Total |           | 7974036 | 100.000 | 100.000  |

Chromatogram  
 ZL0516 C:\LabSolutions\Data\Project1\Data Reports\ZL0516\_3.lcd

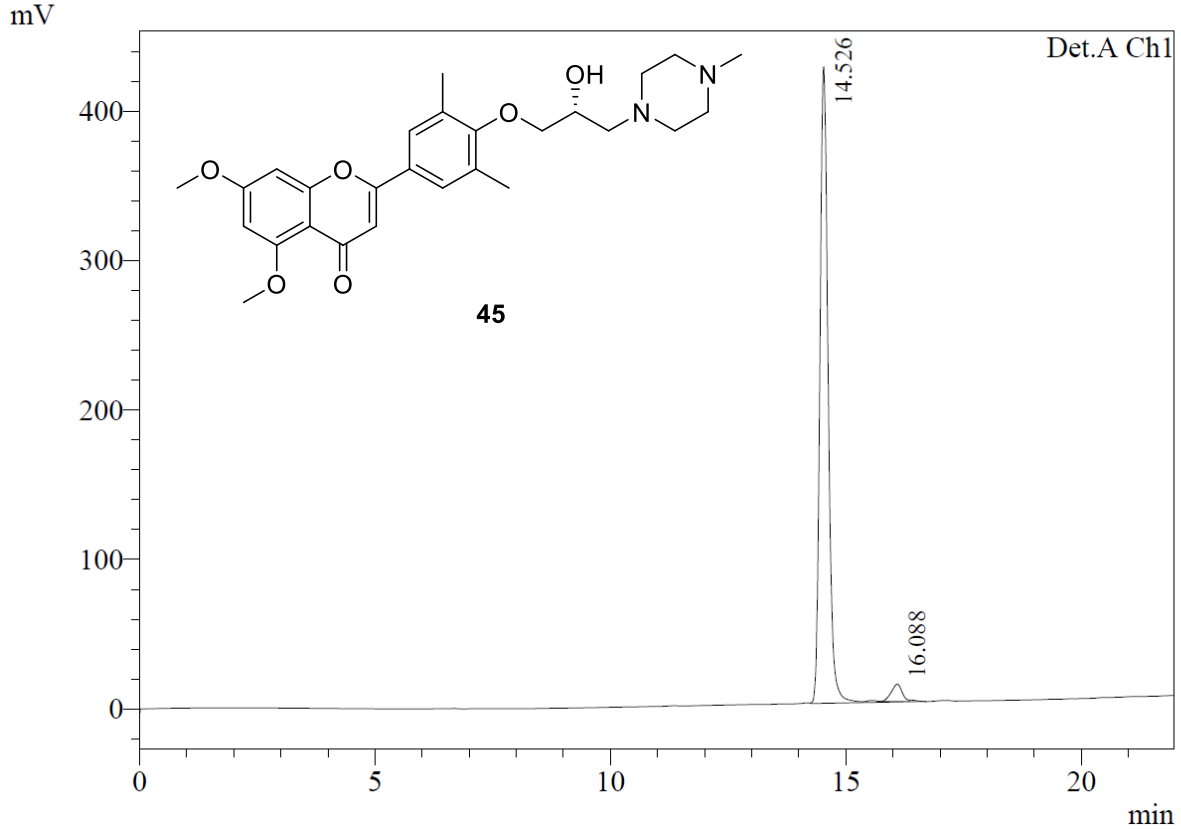

PeakTable

Detector A Ch1 254nm

| Peak# | Ret. Time | Area    | Area %  | Height % |
|-------|-----------|---------|---------|----------|
| 1     | 14.526    | 5197444 | 96.527  | 97.344   |
| 2     | 16.088    | 187015  | 3.473   | 2.656    |
| Total |           | 5384458 | 100.000 | 100.000  |

# Copies of $^1\text{H}$ NMR and $^{13}\text{C}$ NMR

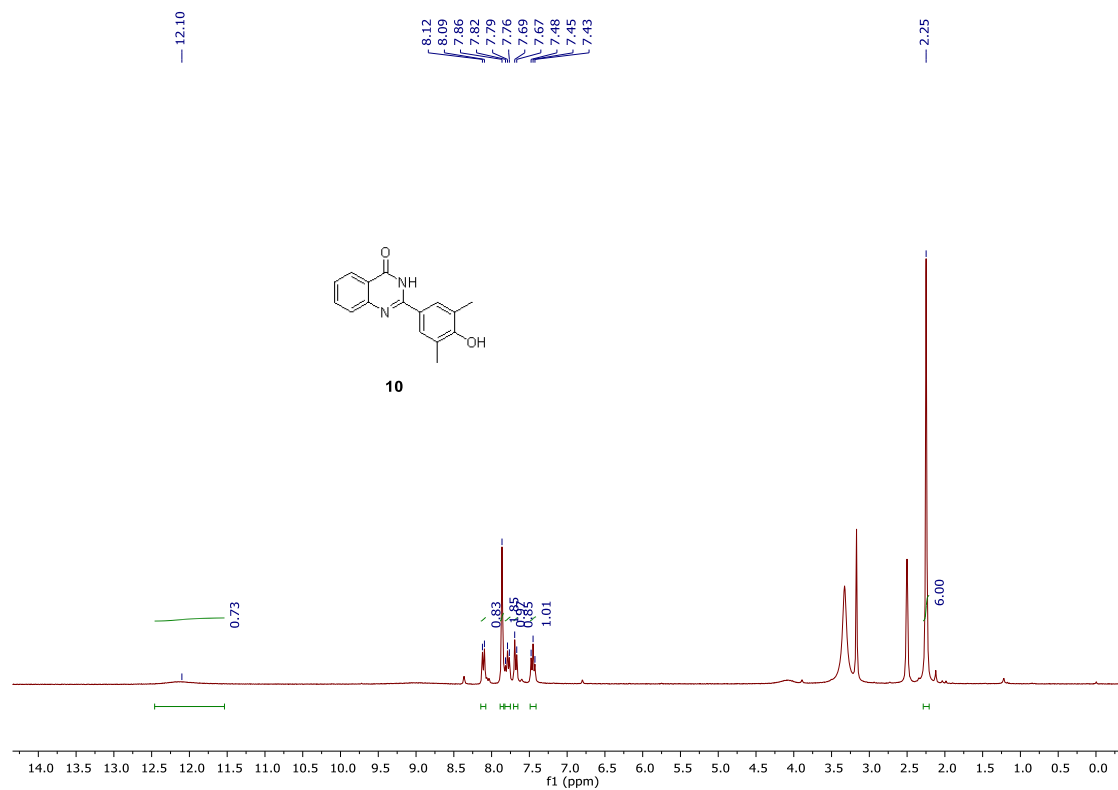



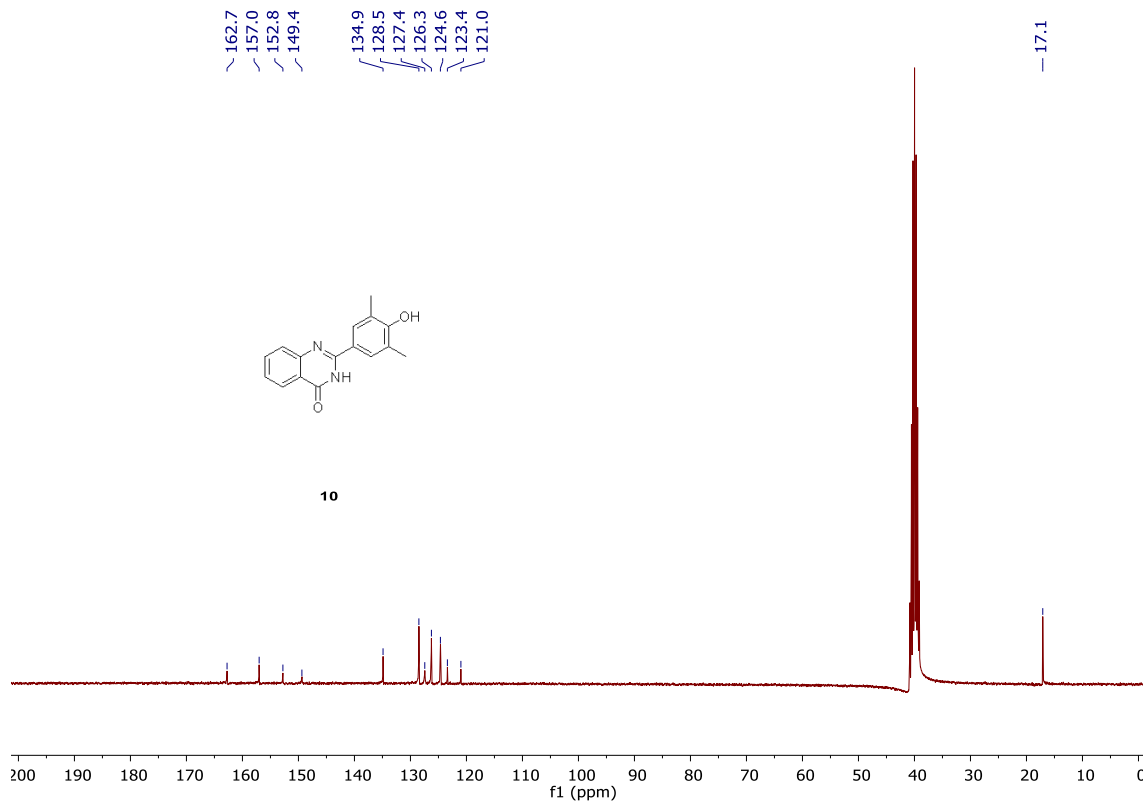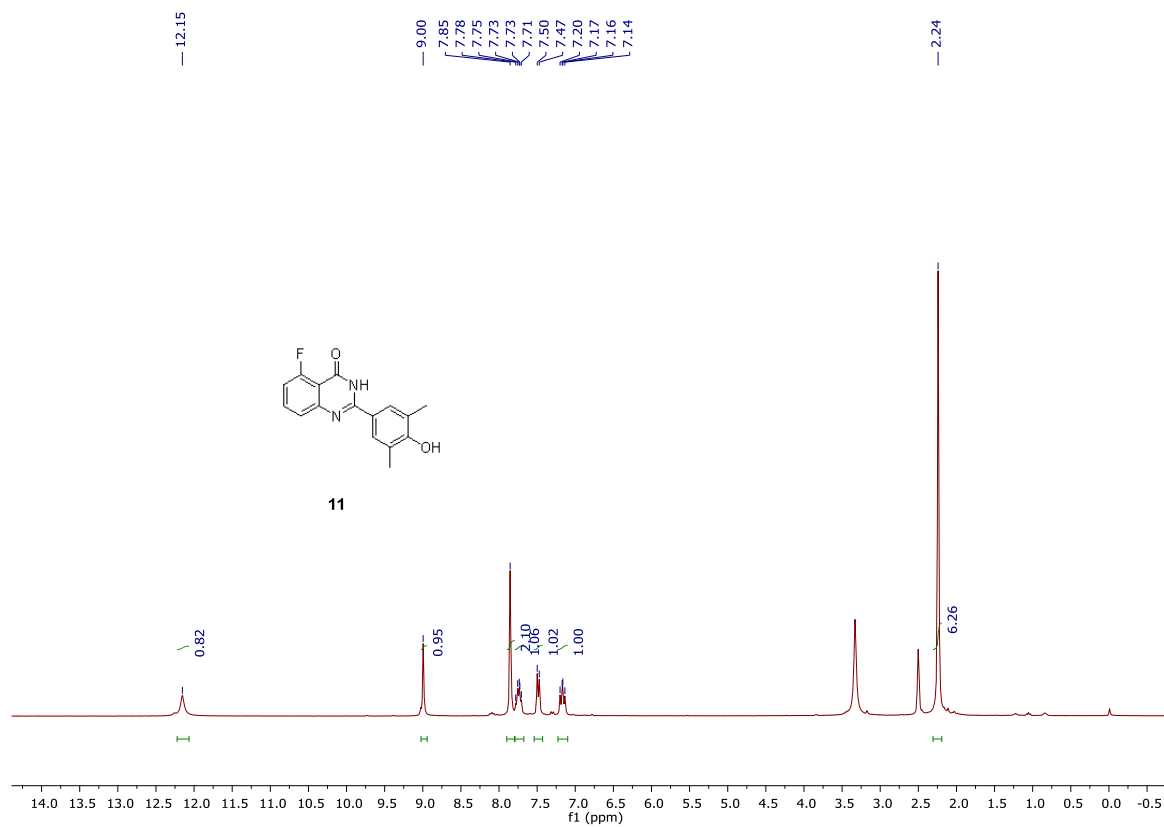

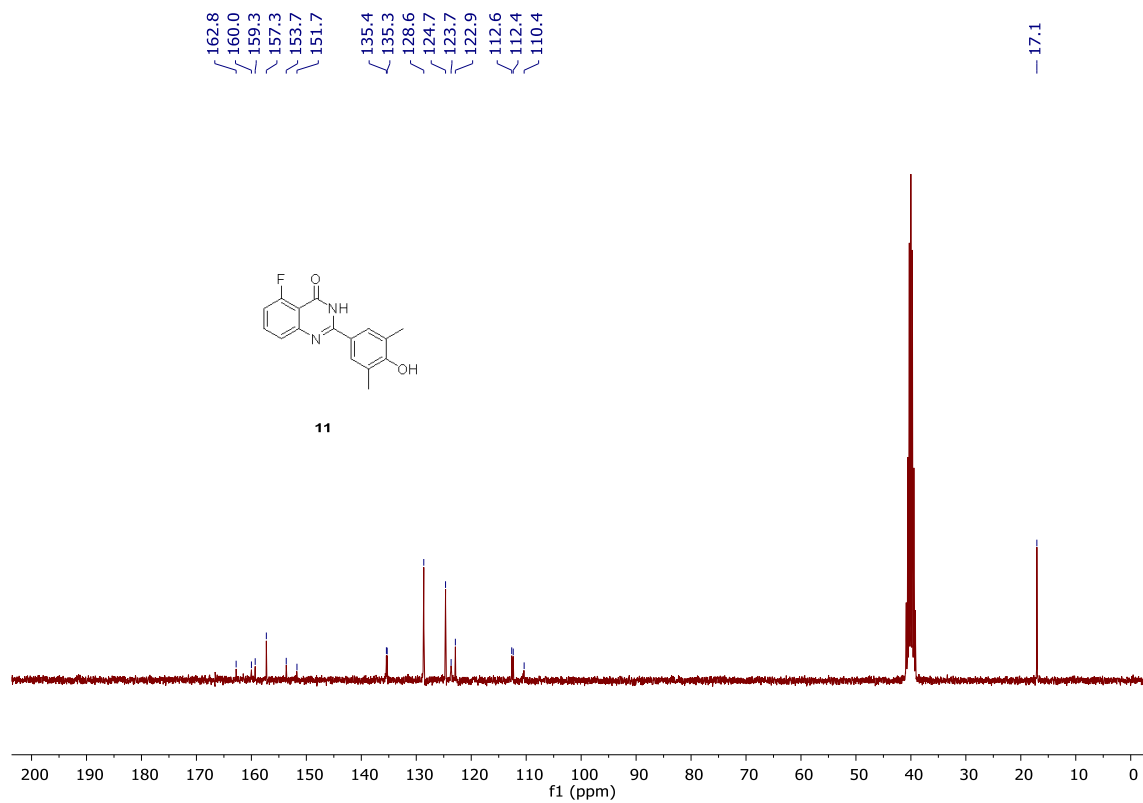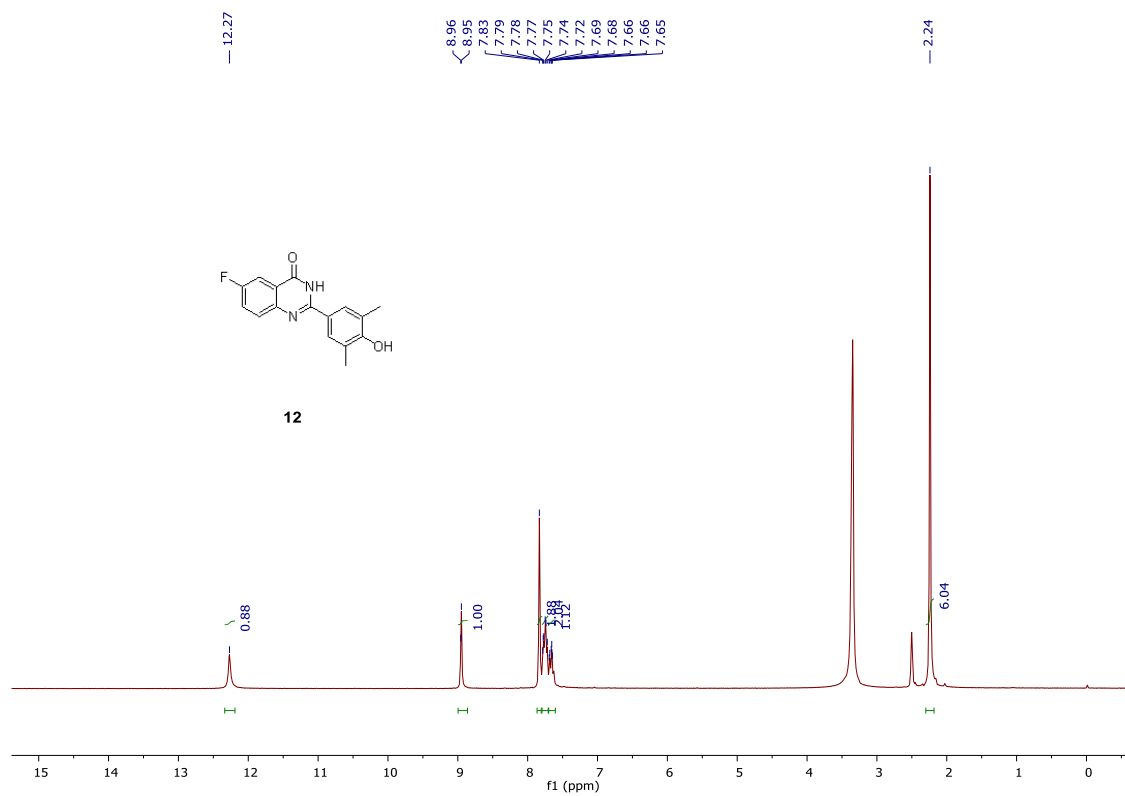

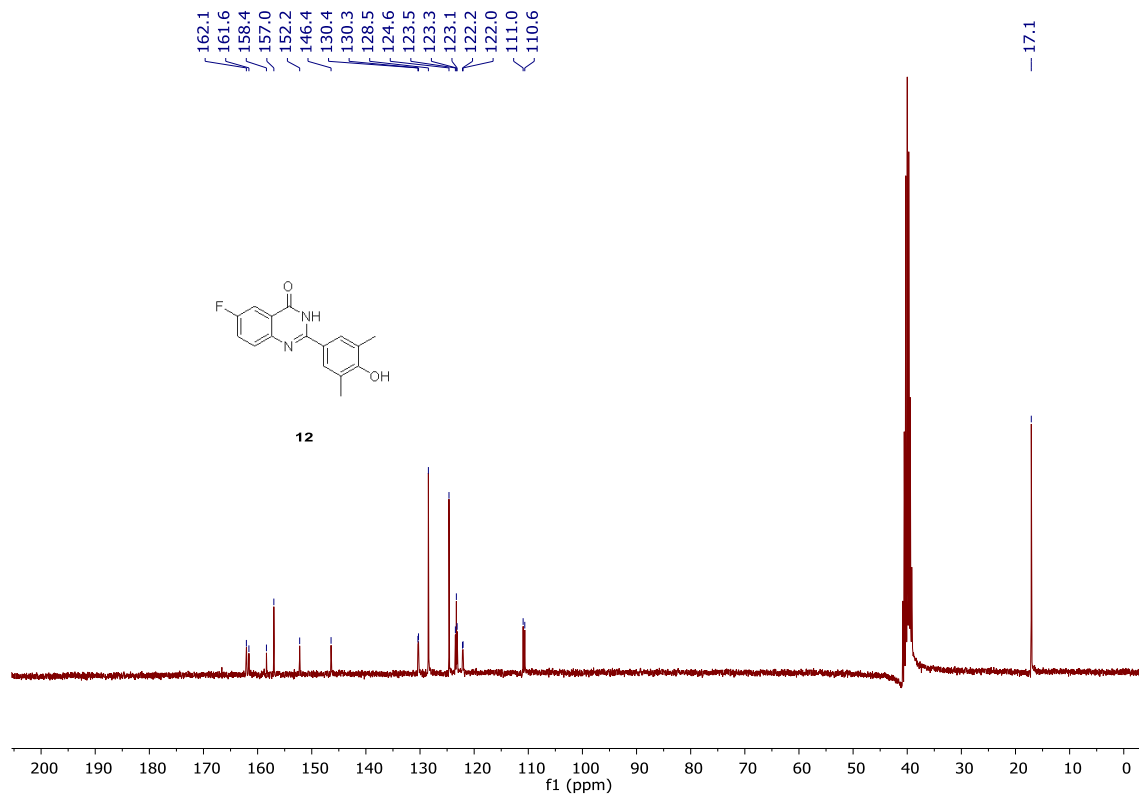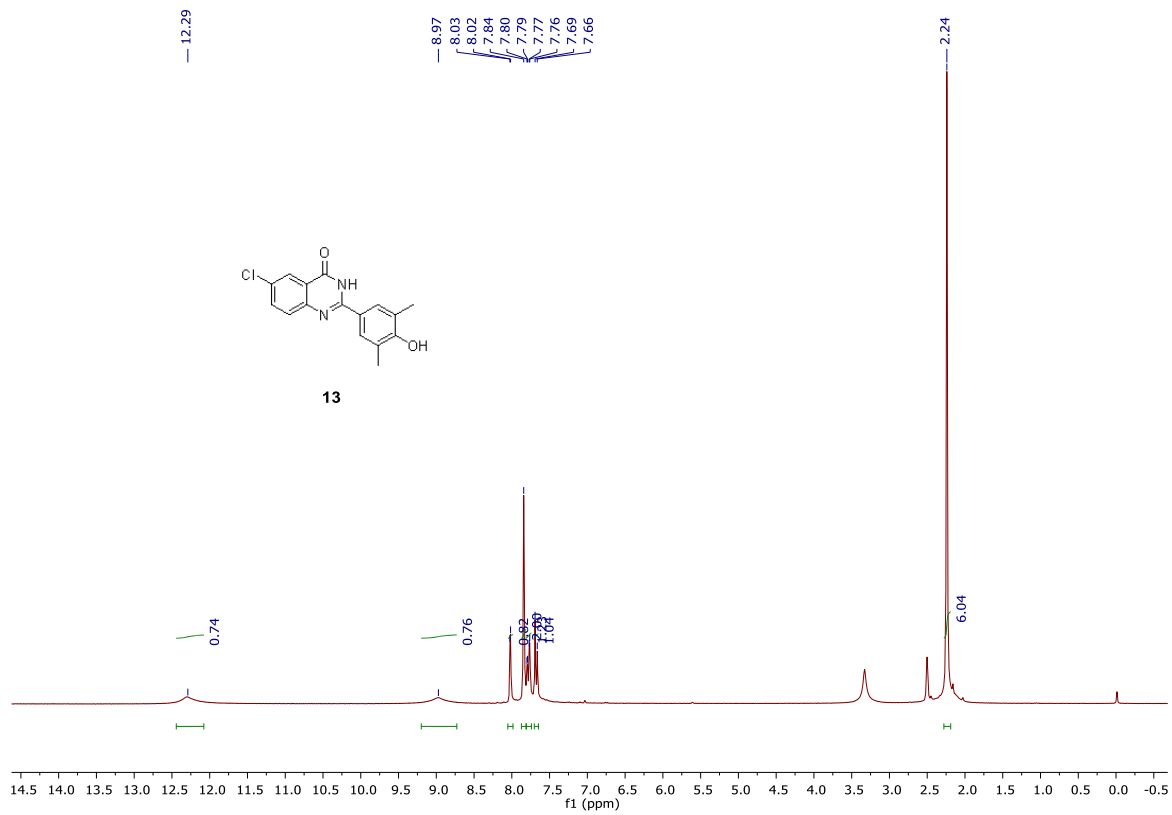

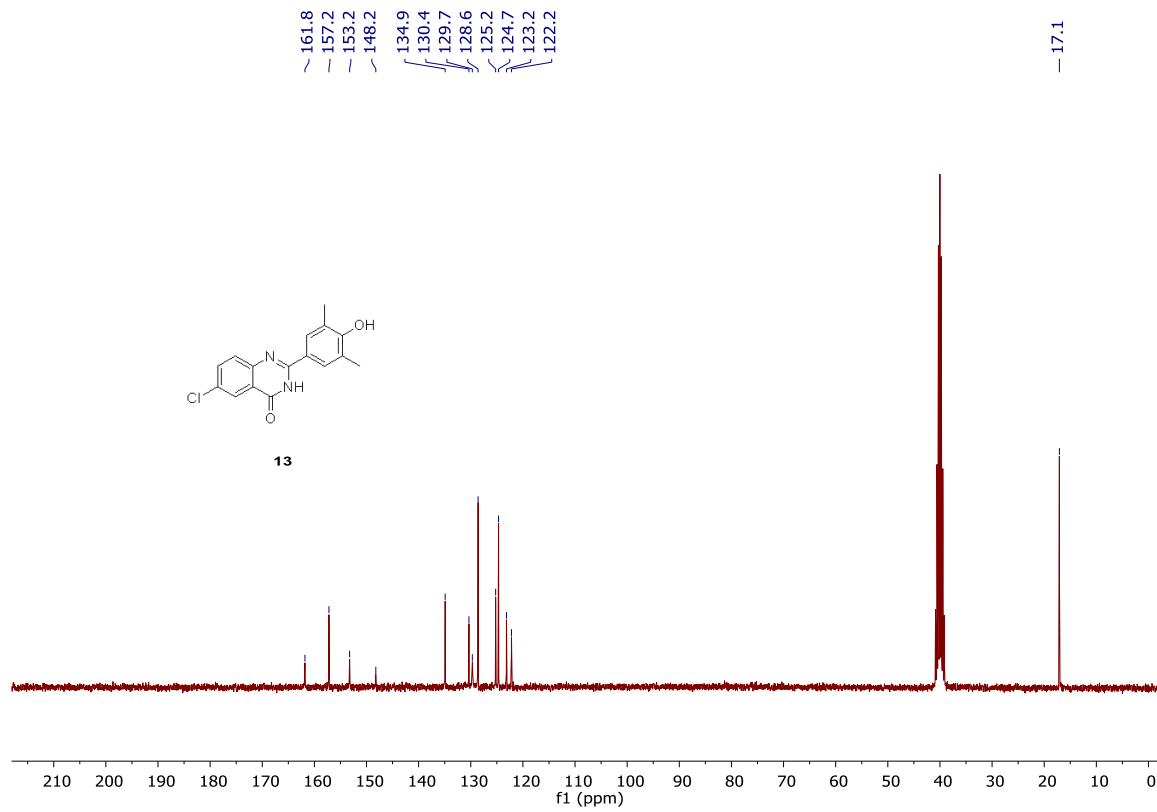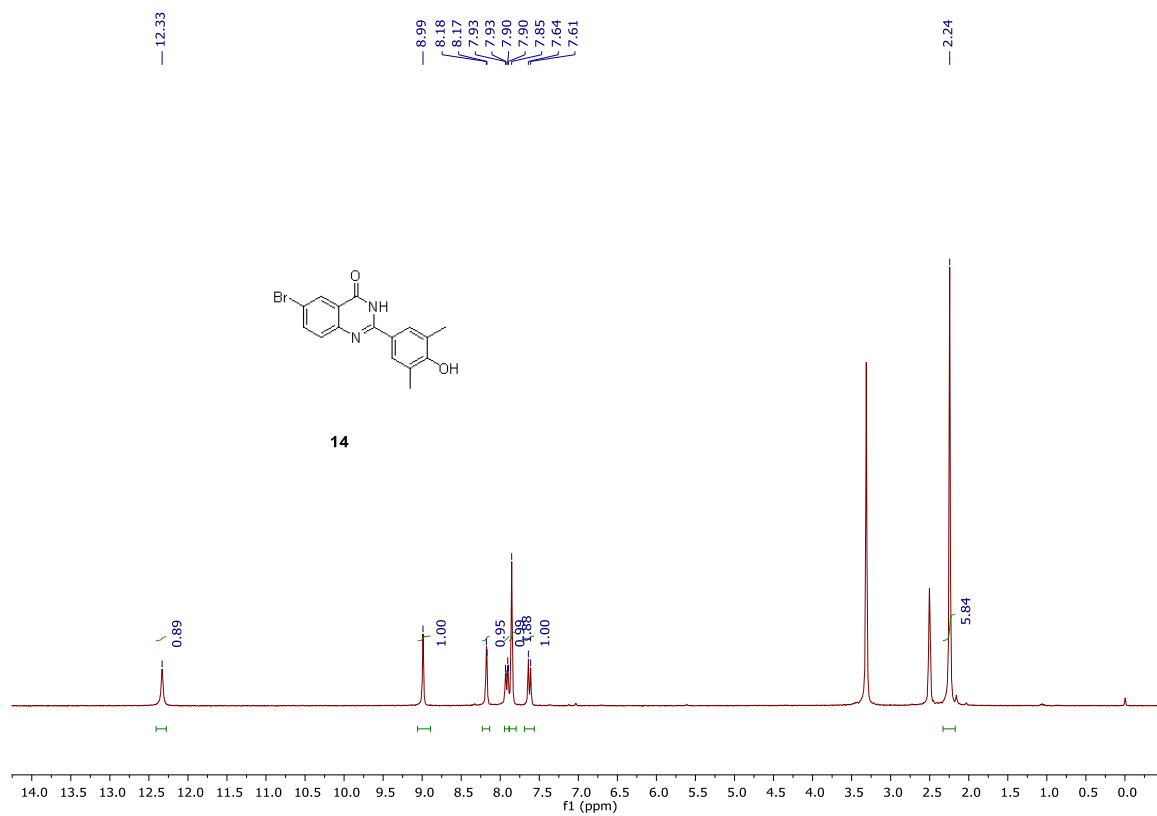

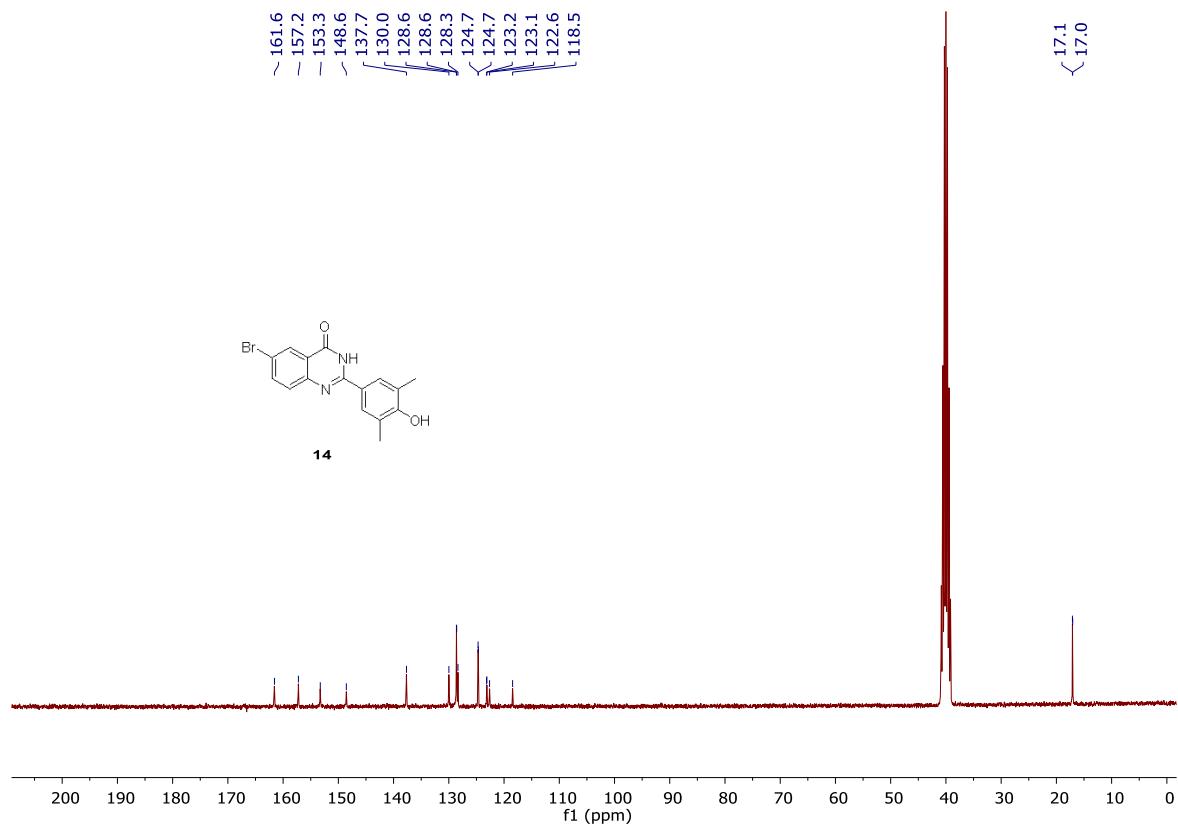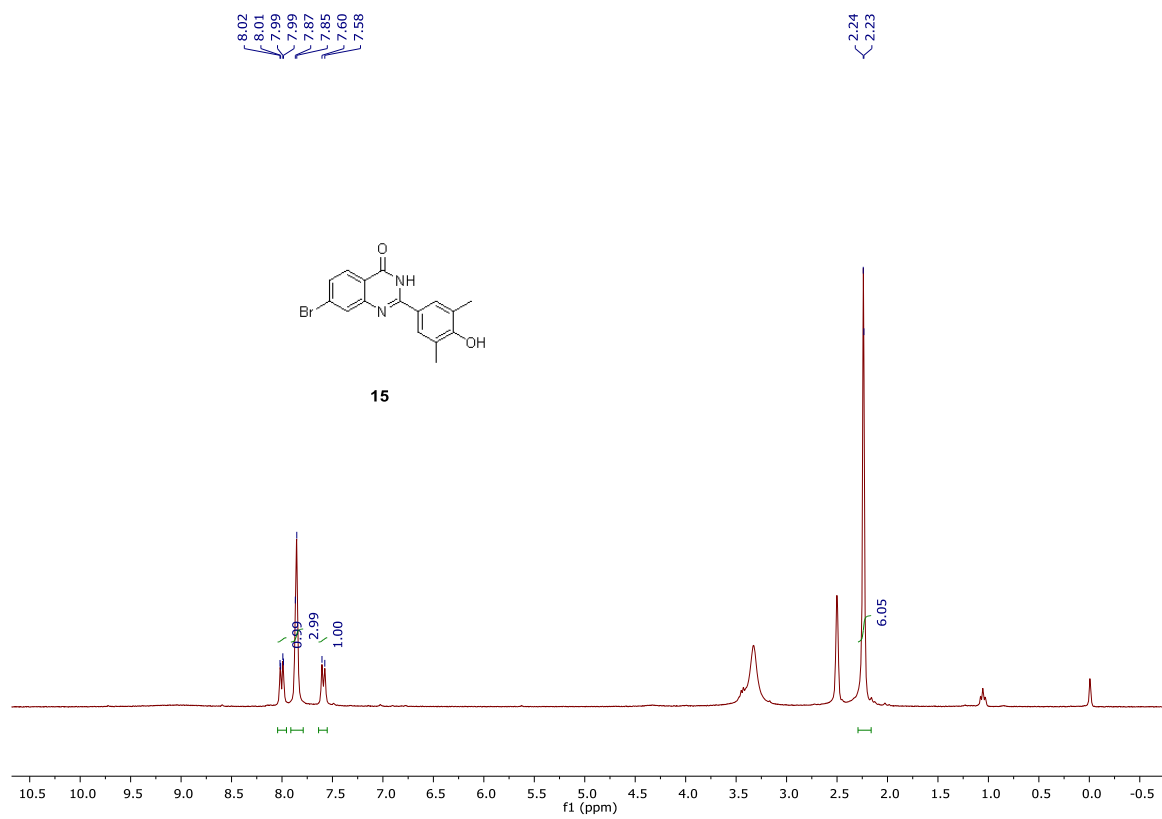

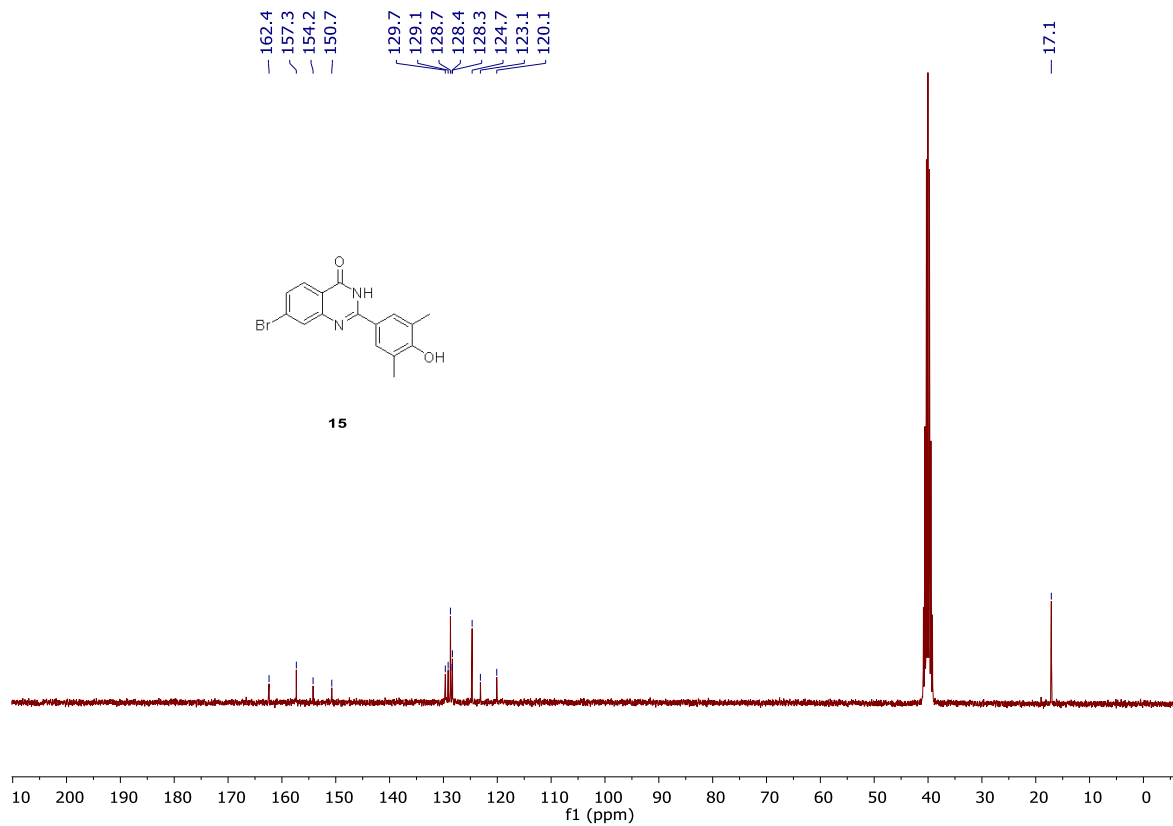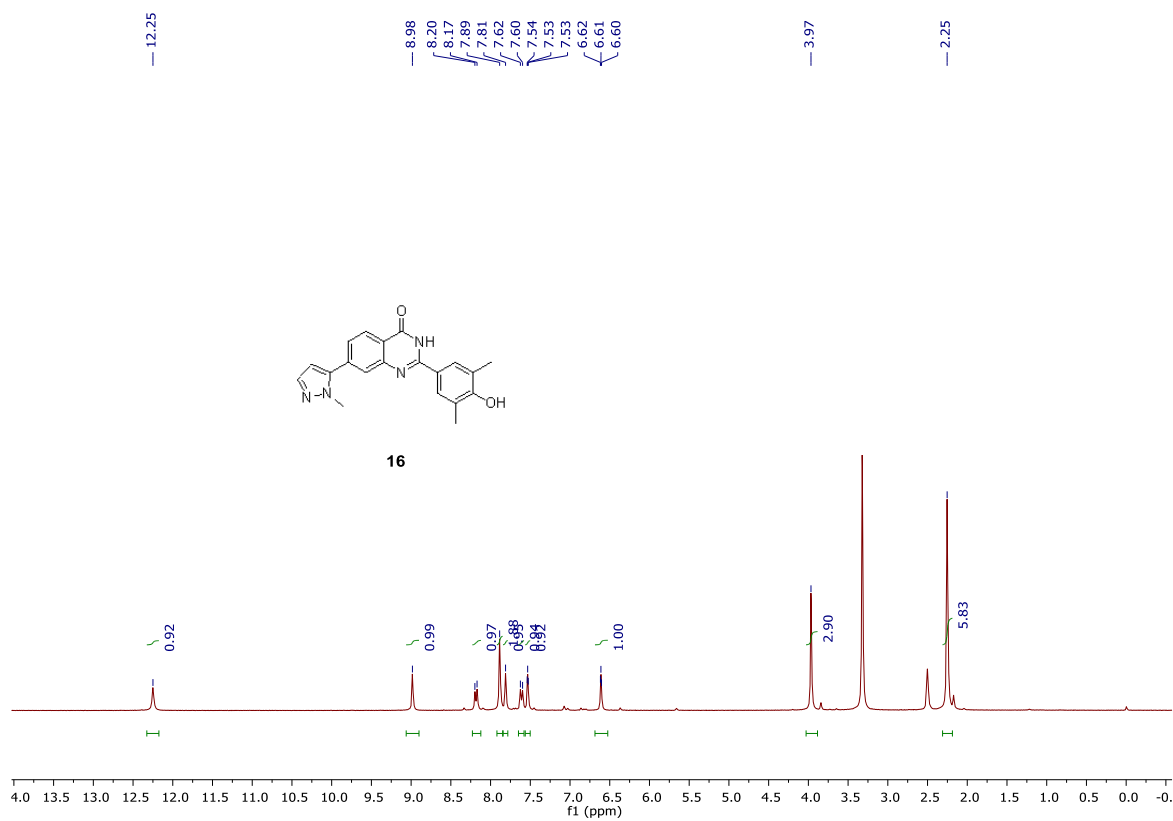

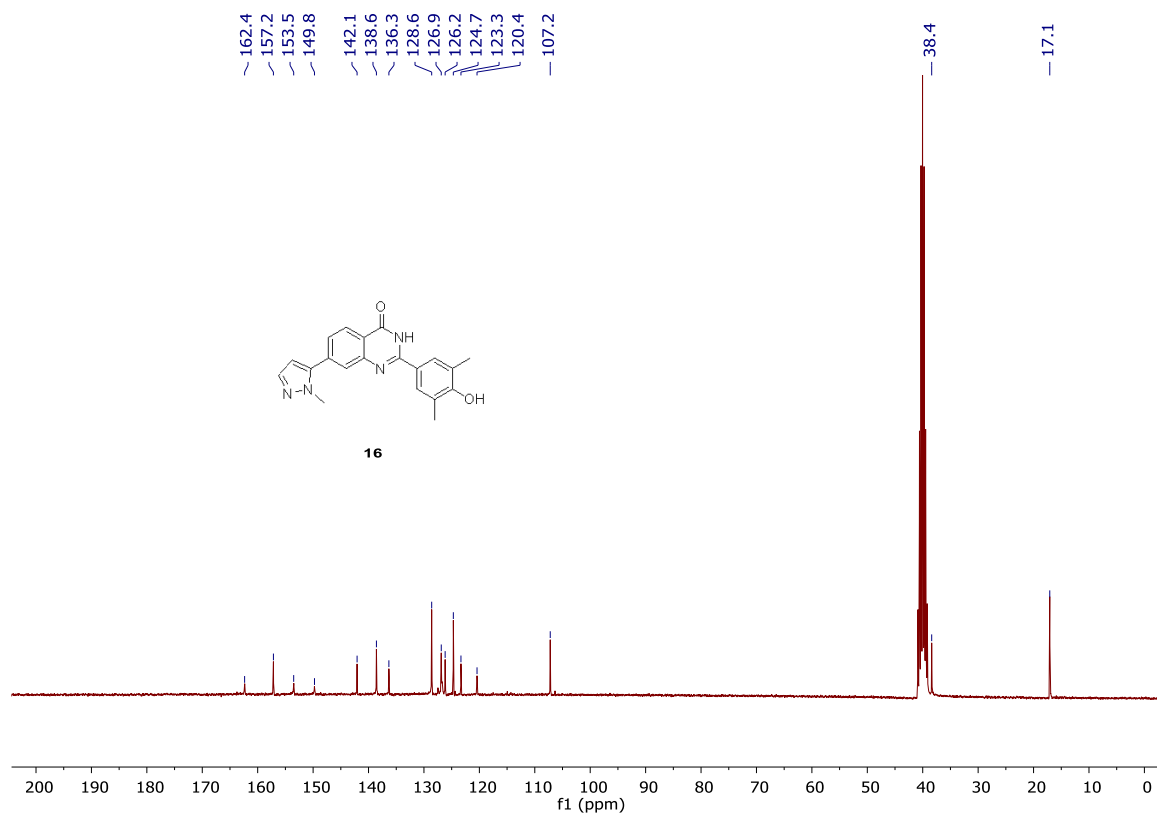

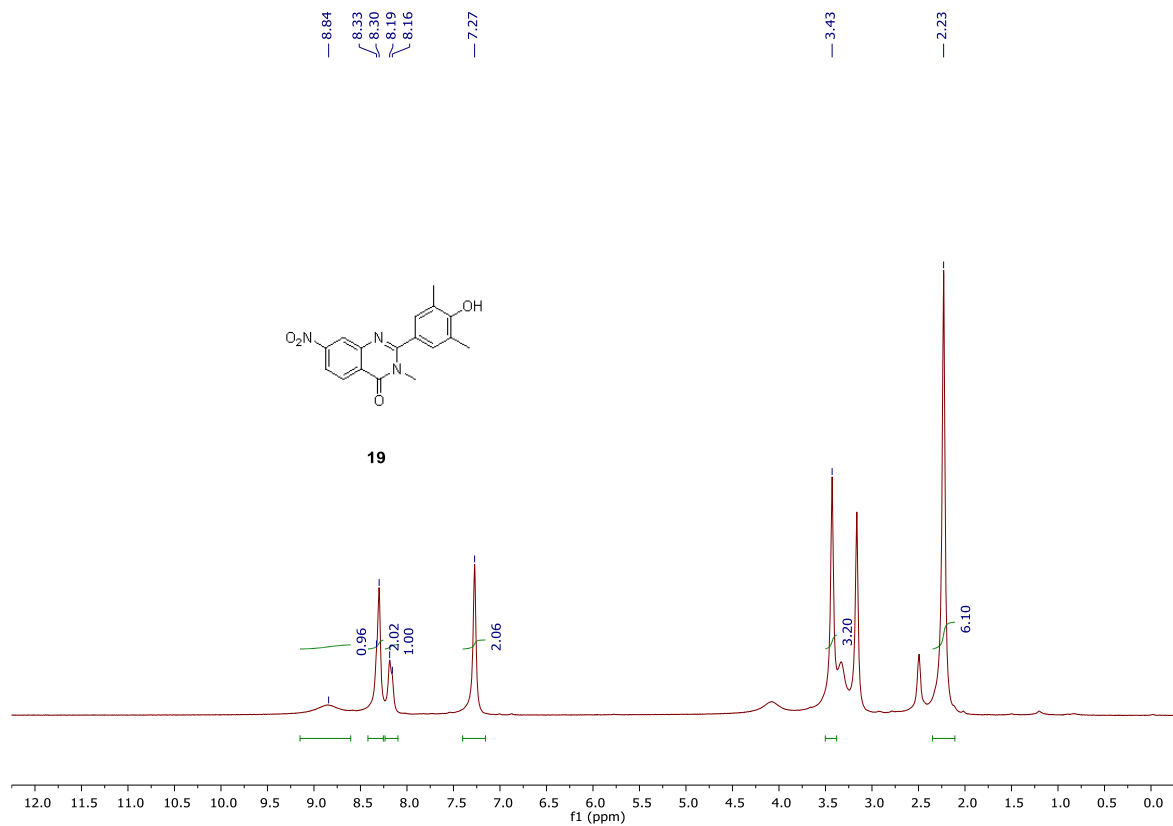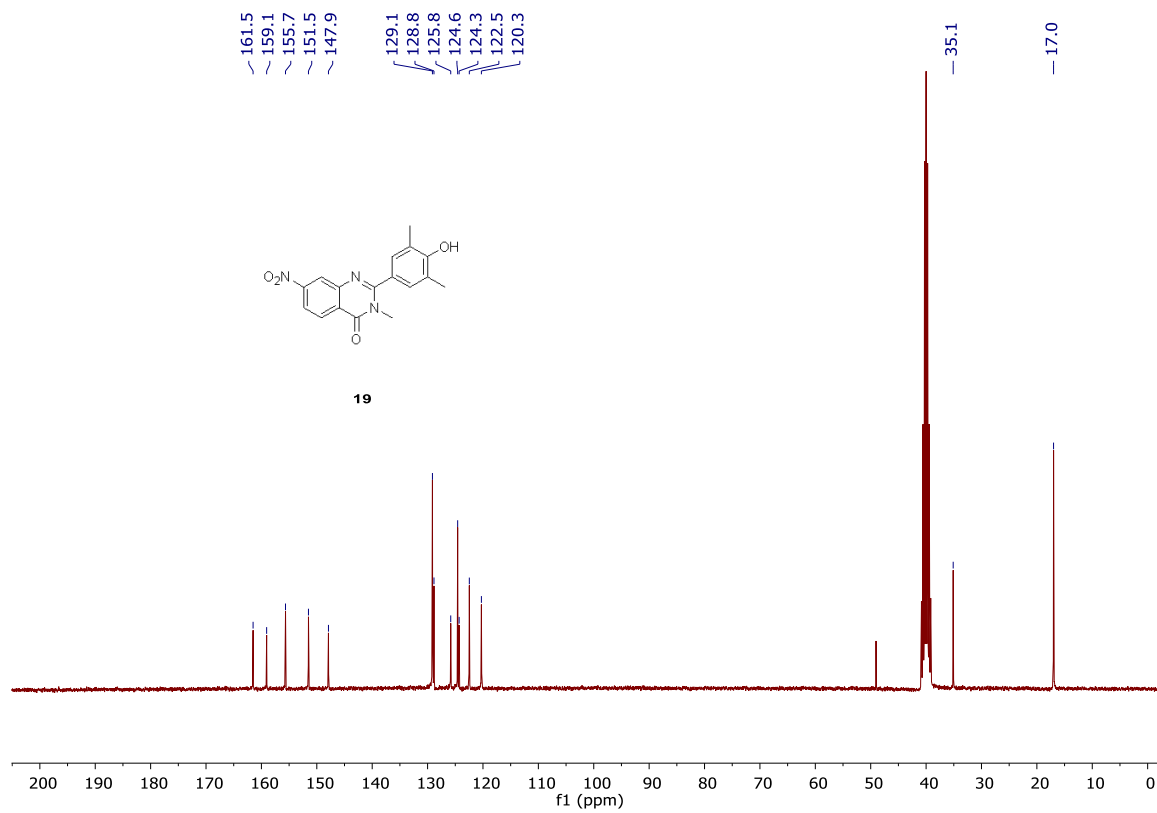



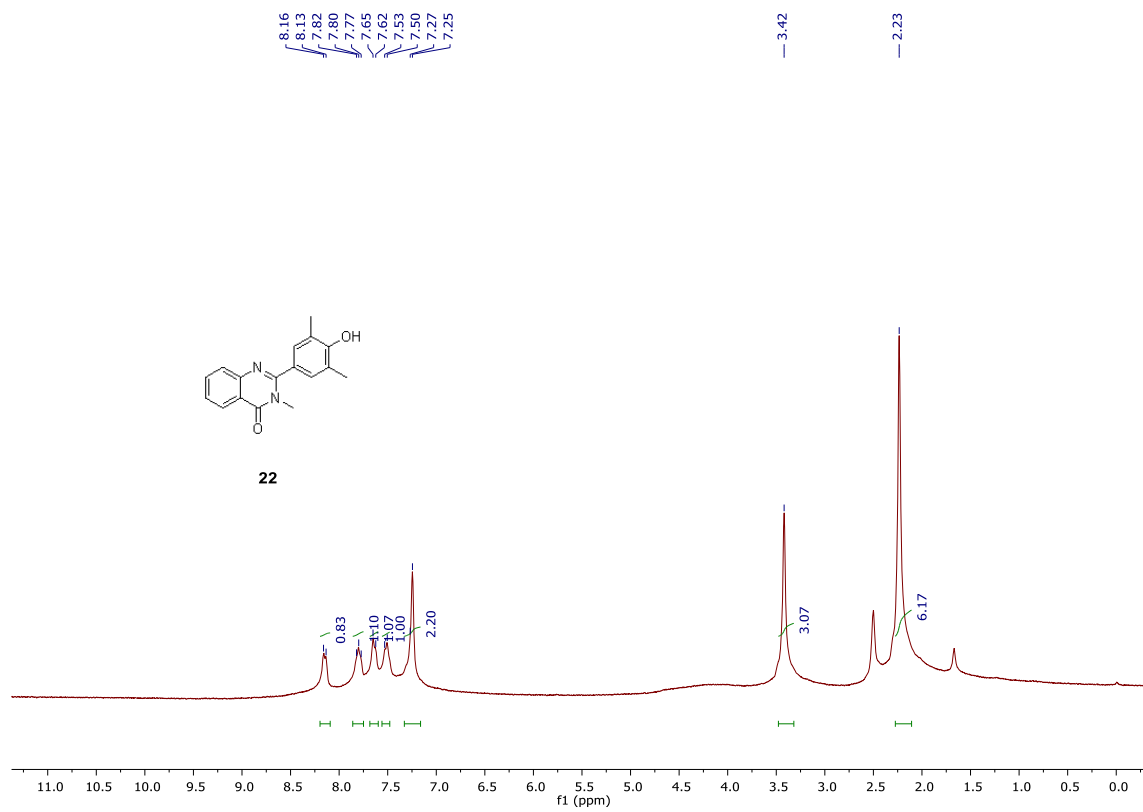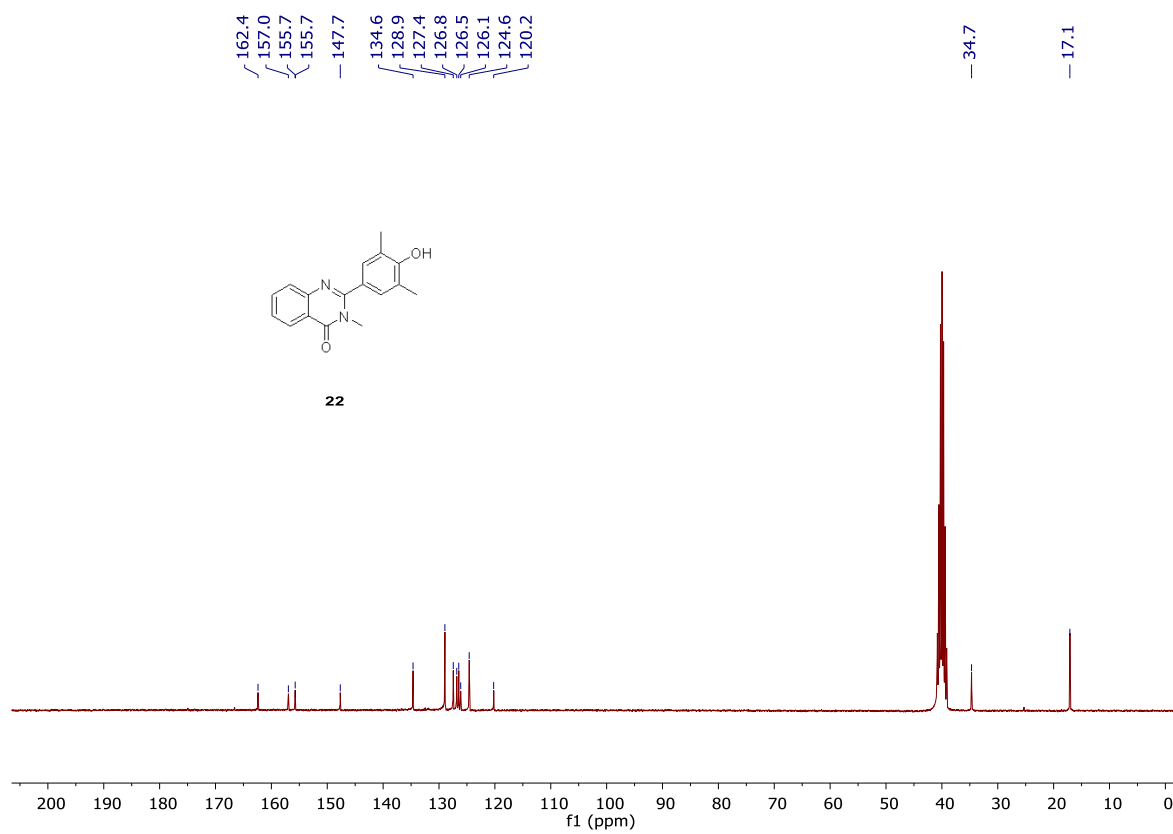

8.16  
7.85  
7.83  
7.80  
7.71  
7.68  
7.64  
7.62  
7.60  
7.58  
7.55  
7.53  
7.50  
6.92  
6.90  
6.88  
6.86

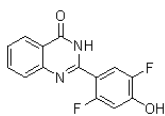

24

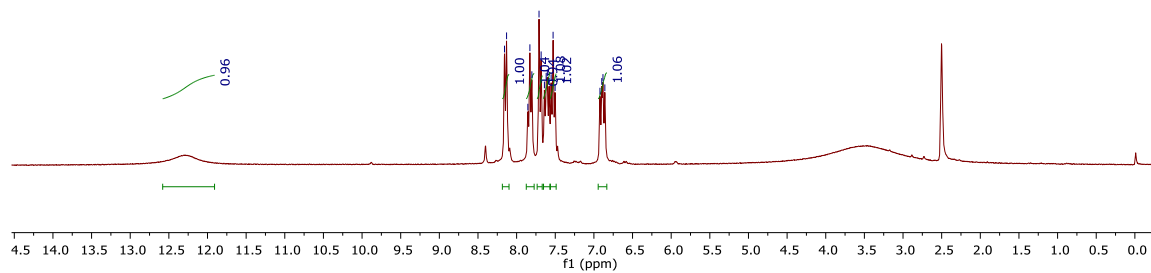

162.0  
158.3  
155.0  
149.5  
149.2  
146.3  
143.3  
134.9  
127.7  
127.2  
126.3  
121.4  
117.8  
117.5  
117.5  
112.5  
112.4  
106.0  
105.6

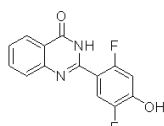

24

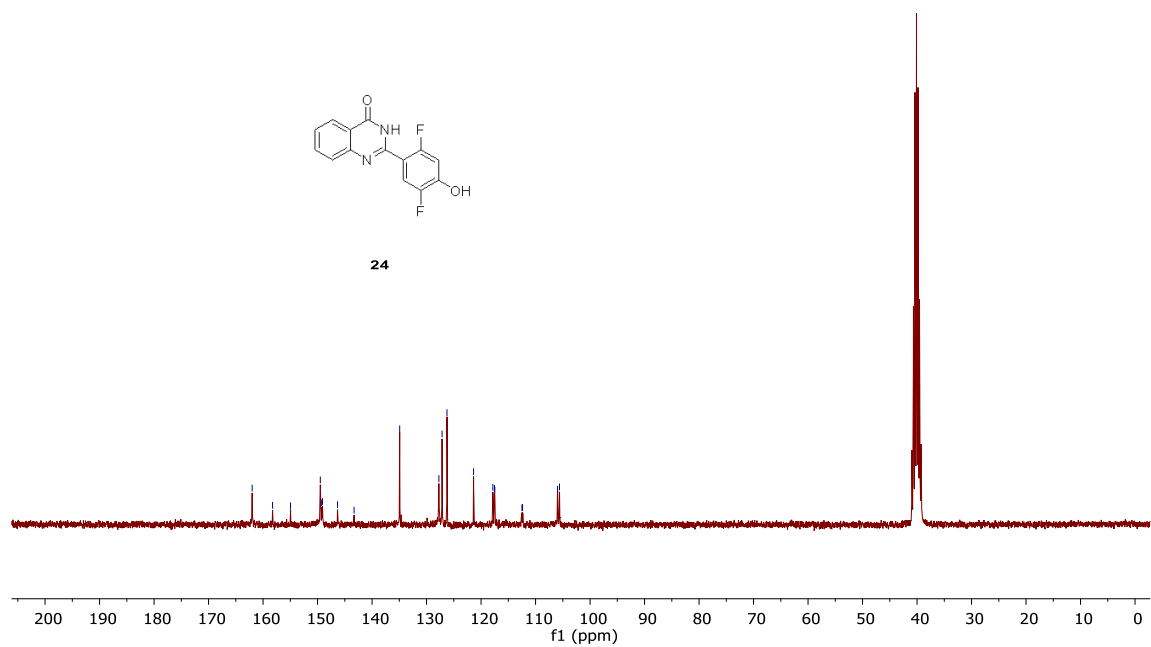

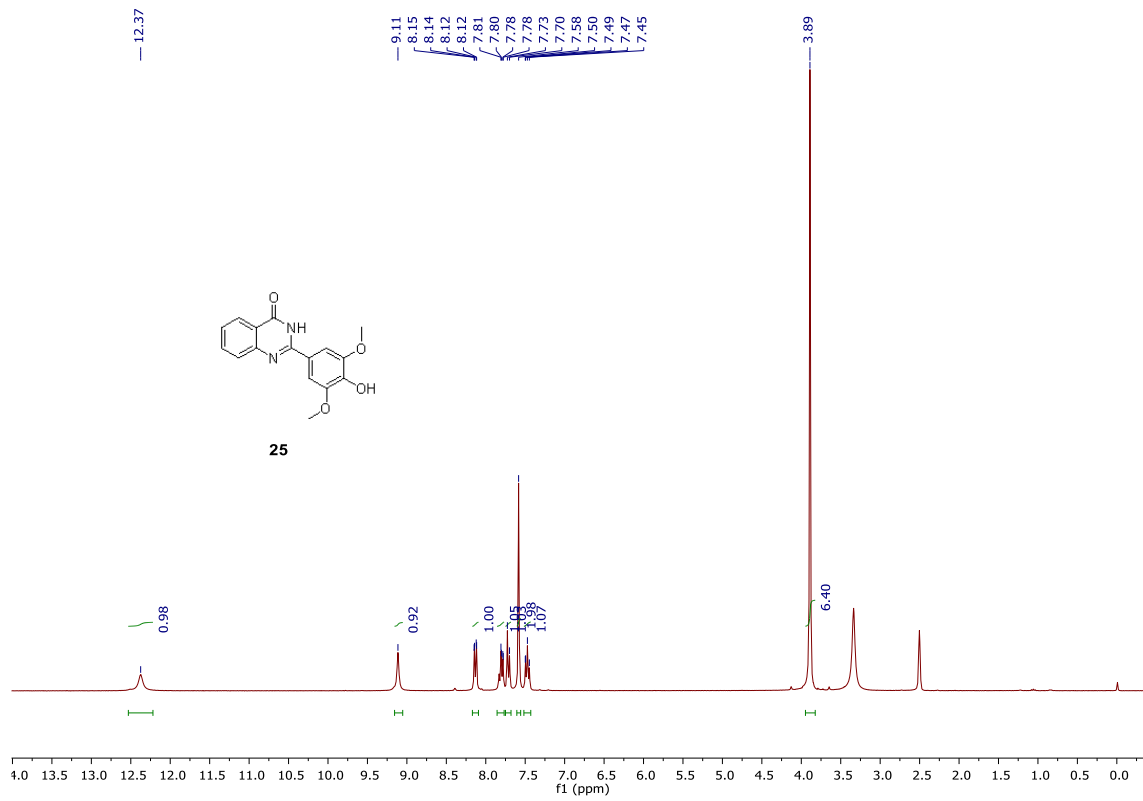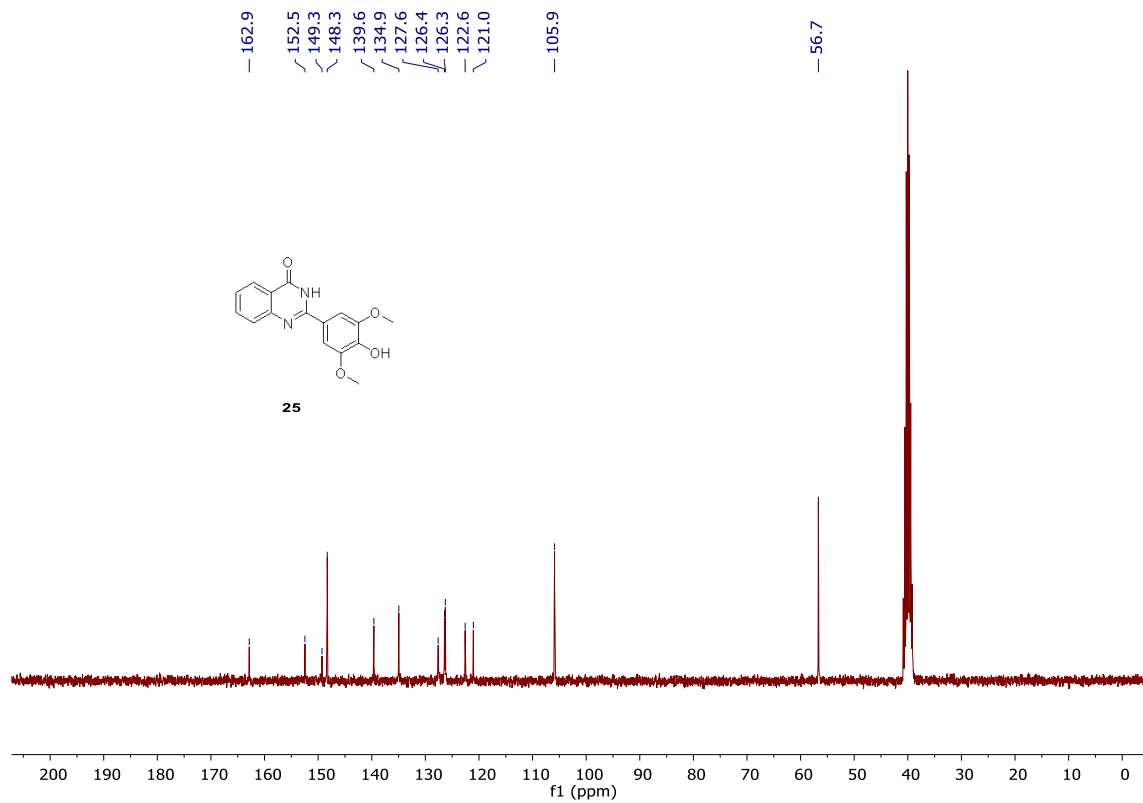

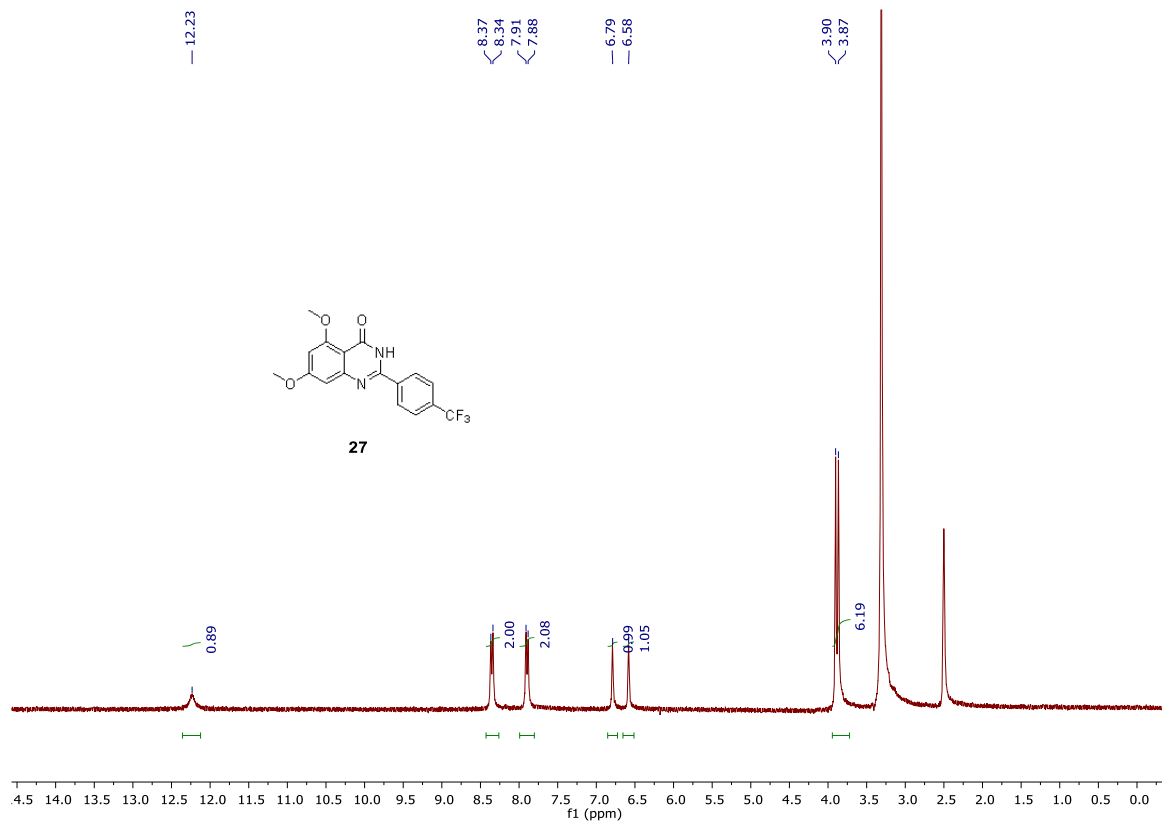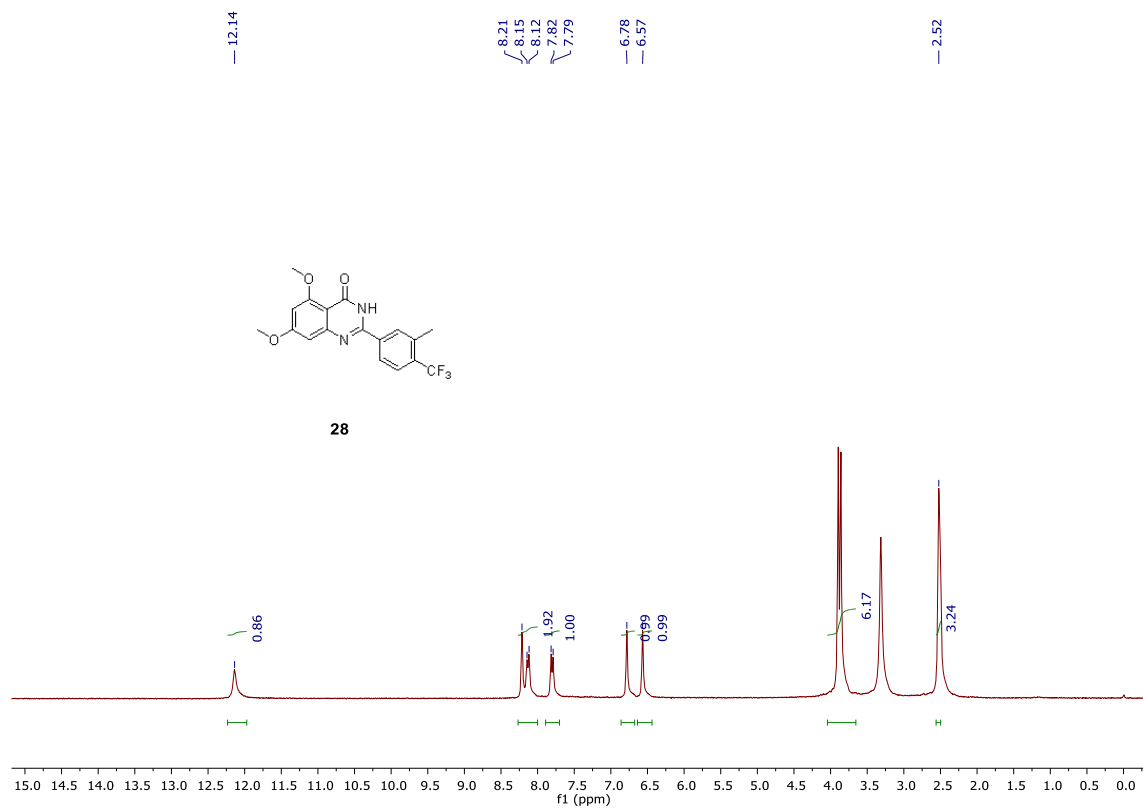

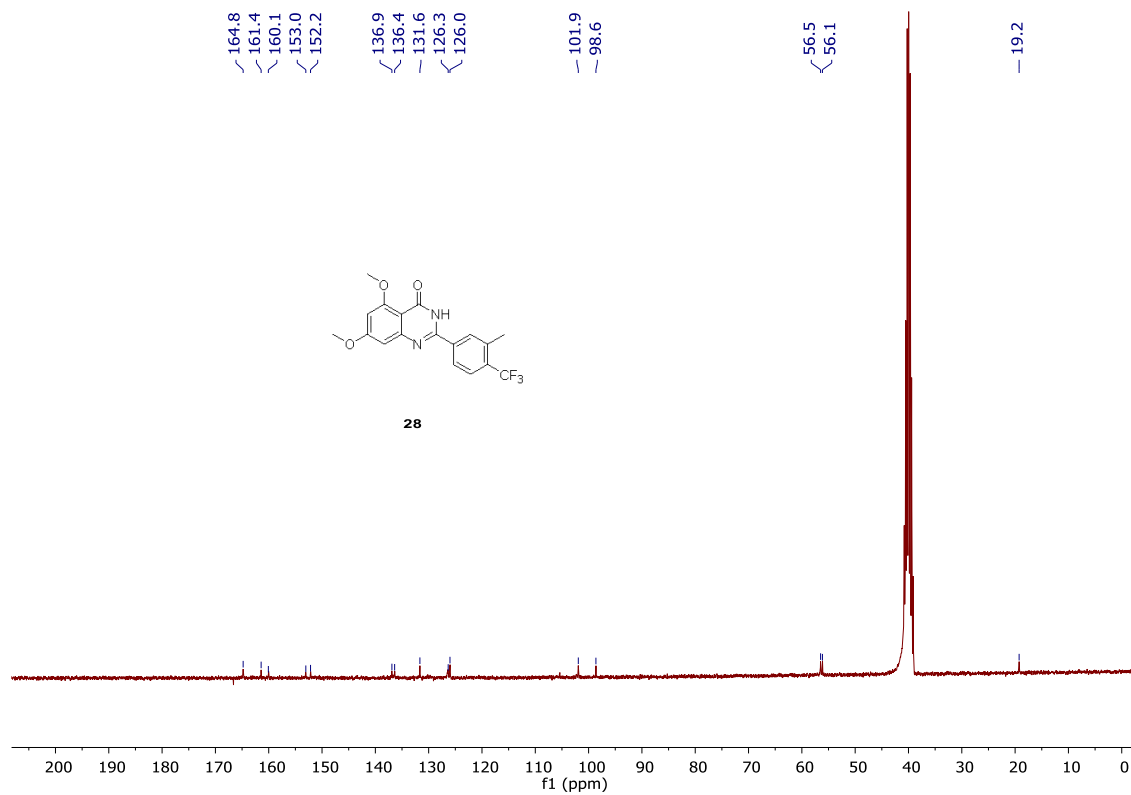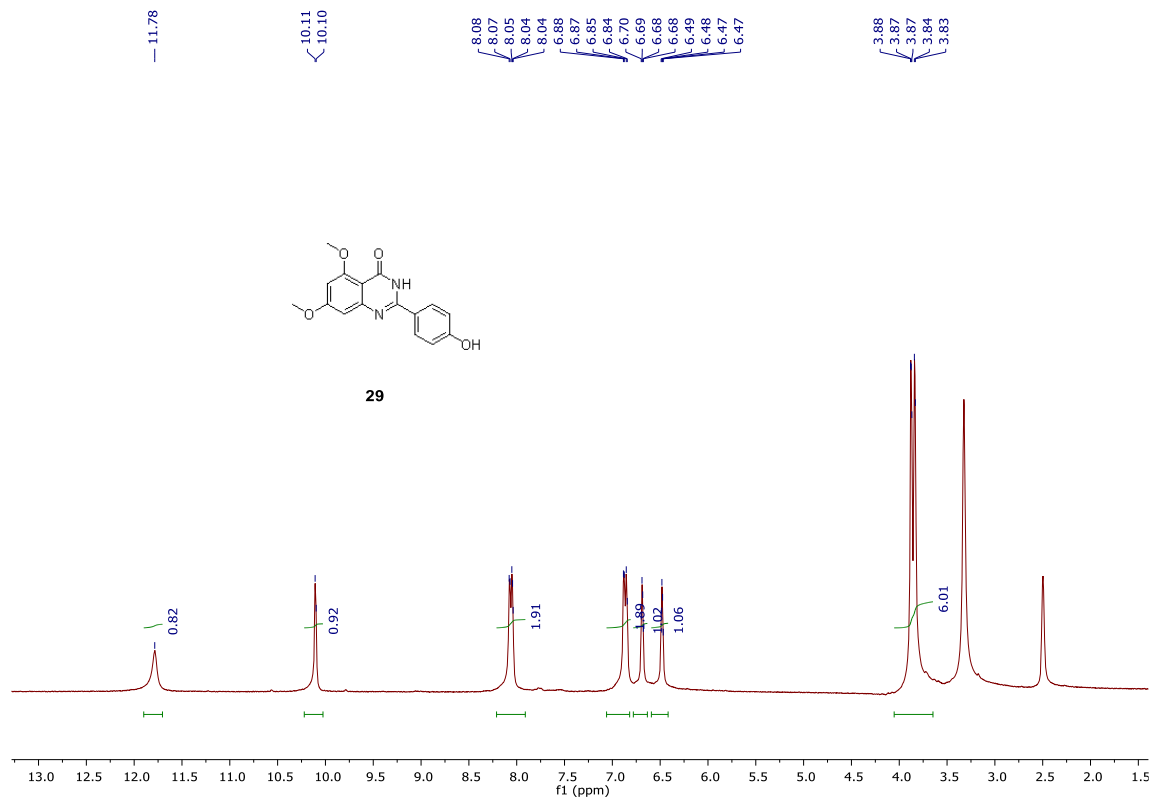

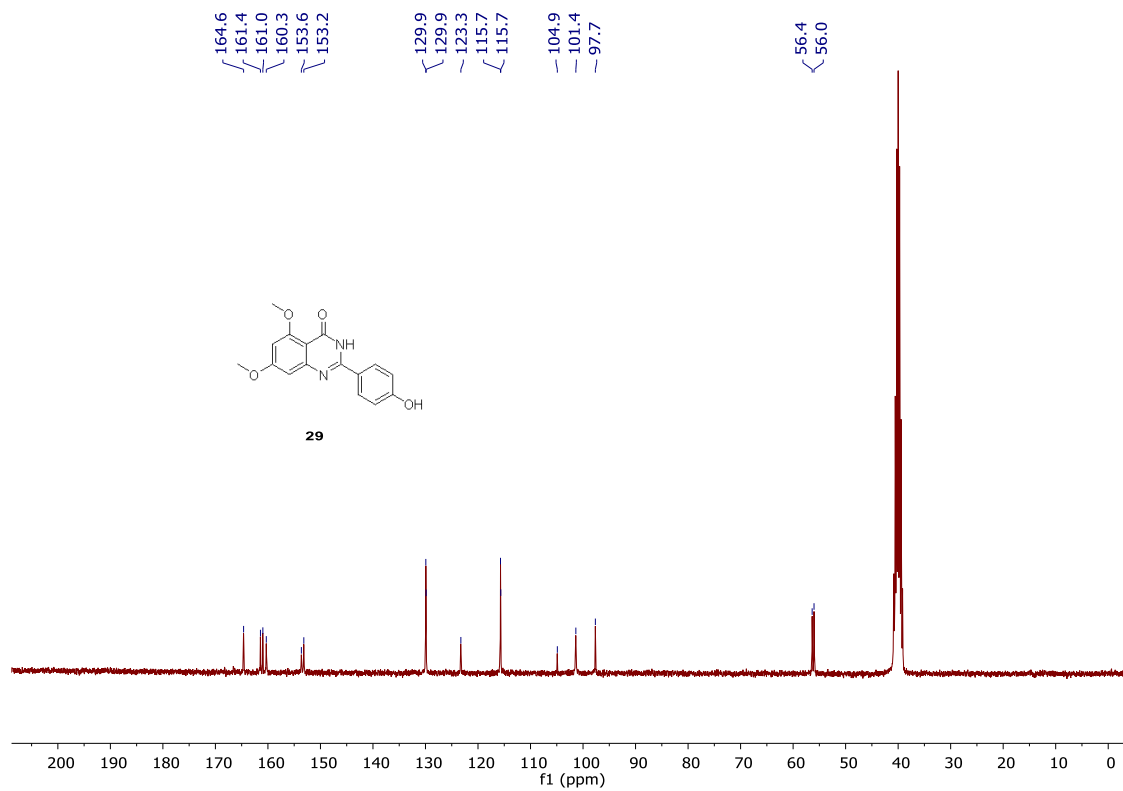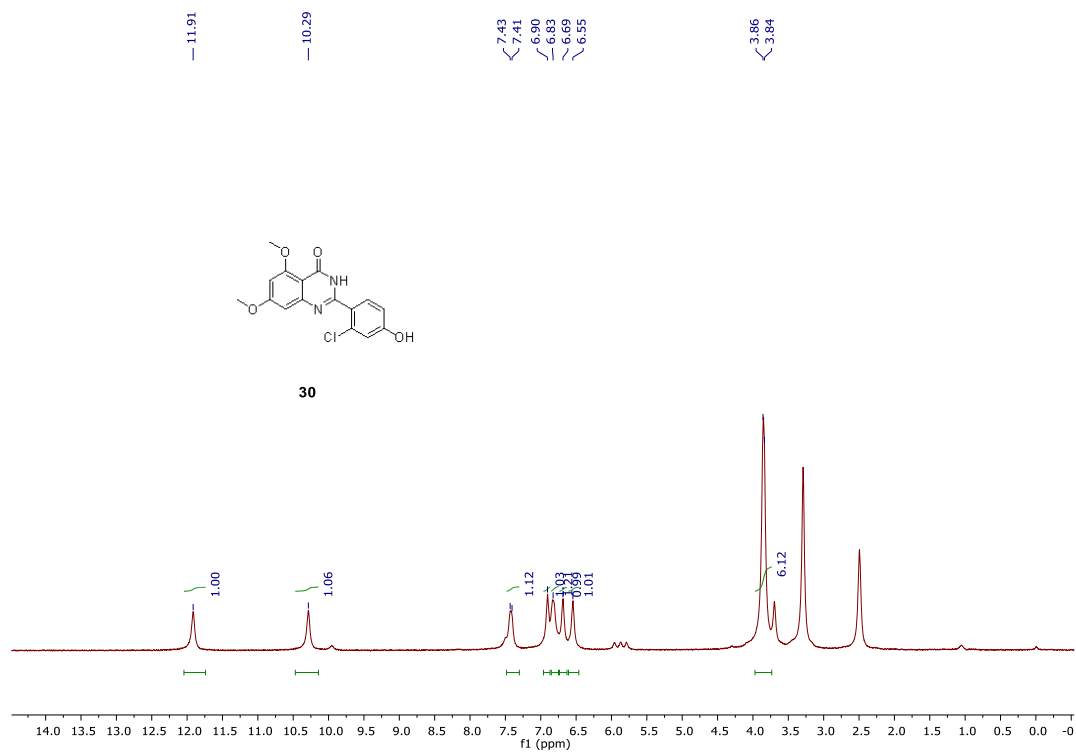

164.7  
 161.5  
 160.0  
 159.7  
 153.6  
 153.3  
 132.6  
 132.3  
 124.8  
 116.6  
 114.7  
 105.3  
 101.6  
 98.3  
 56.5  
 56.1

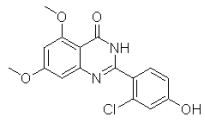

30

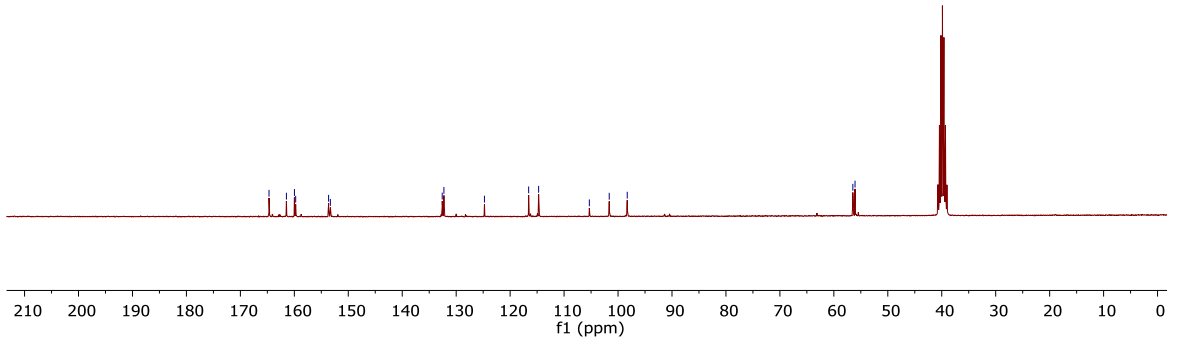

11.80  
 7.88  
 6.73  
 6.72  
 6.50  
 6.49  
 5.59  
 5.58  
 3.88  
 3.84  
 3.79  
 3.51  
 3.50  
 3.48  
 3.47  
 3.41  
 3.40  
 3.37  
 3.36  
 2.31

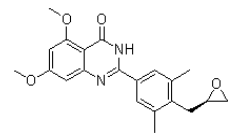

31

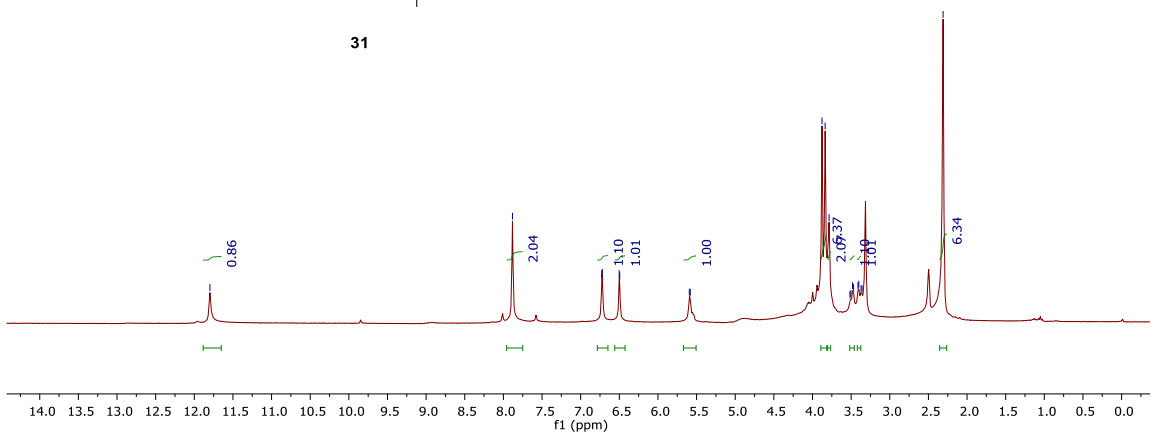

164.7  
161.4  
160.2  
158.3  
153.5  
152.9

131.1  
128.8  
127.9

105.1  
101.6  
98.0

75.2  
69.4

56.4  
56.1

16.6  
12.1

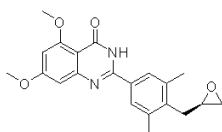

31

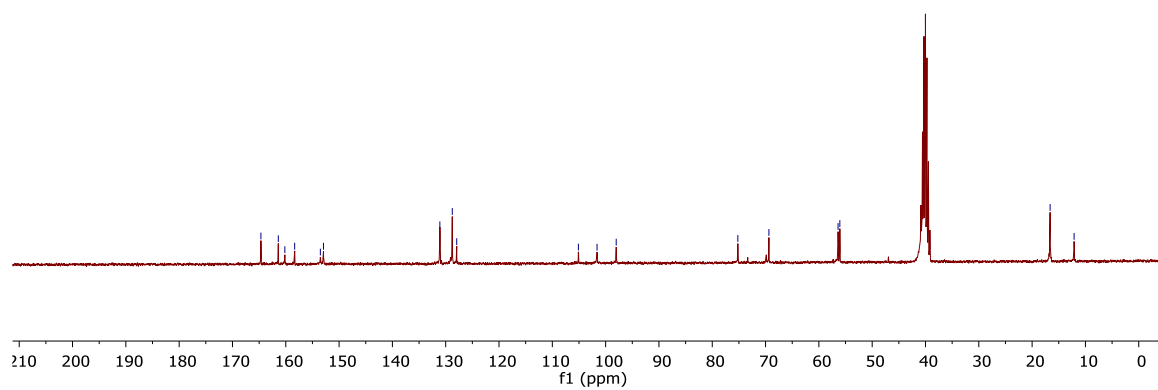



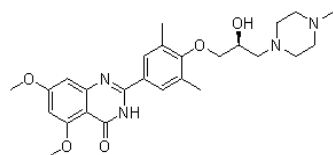

32

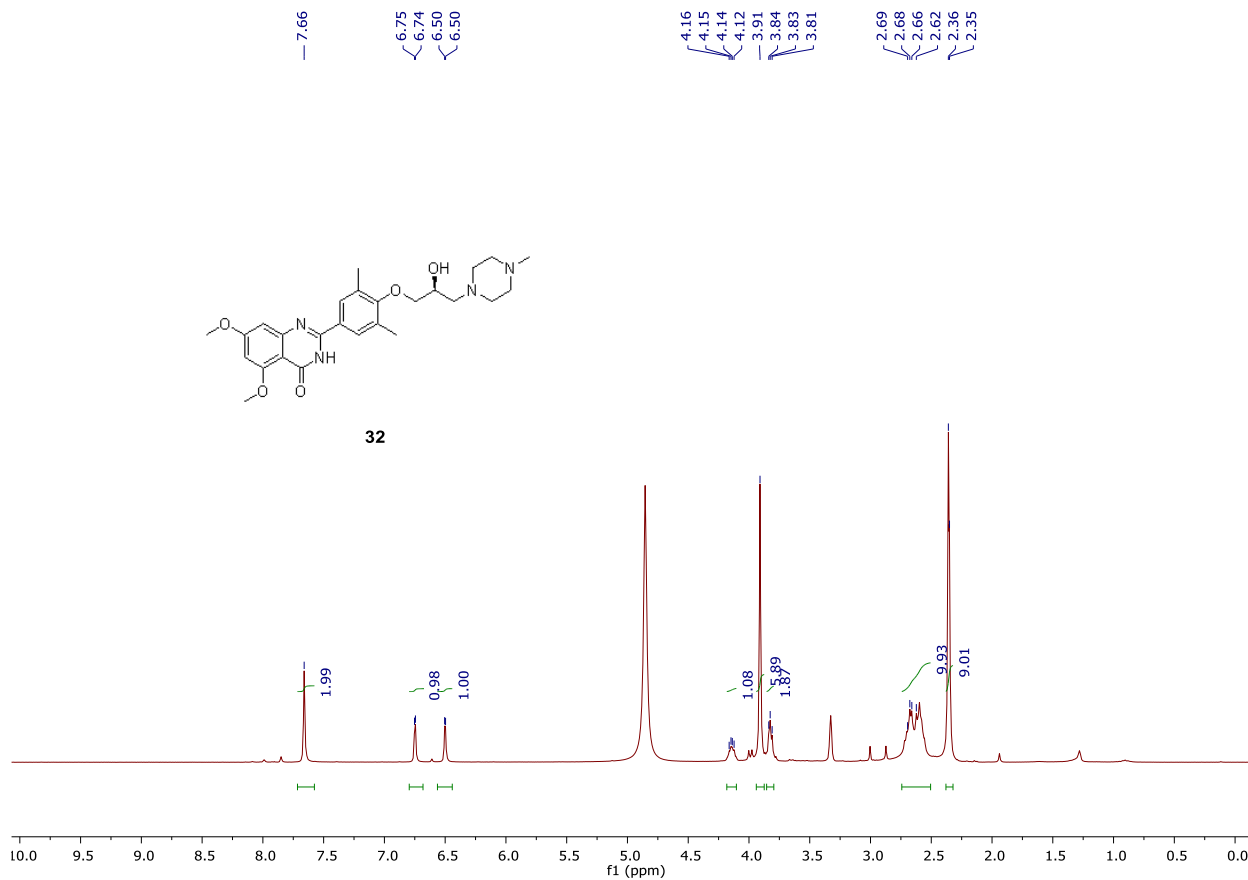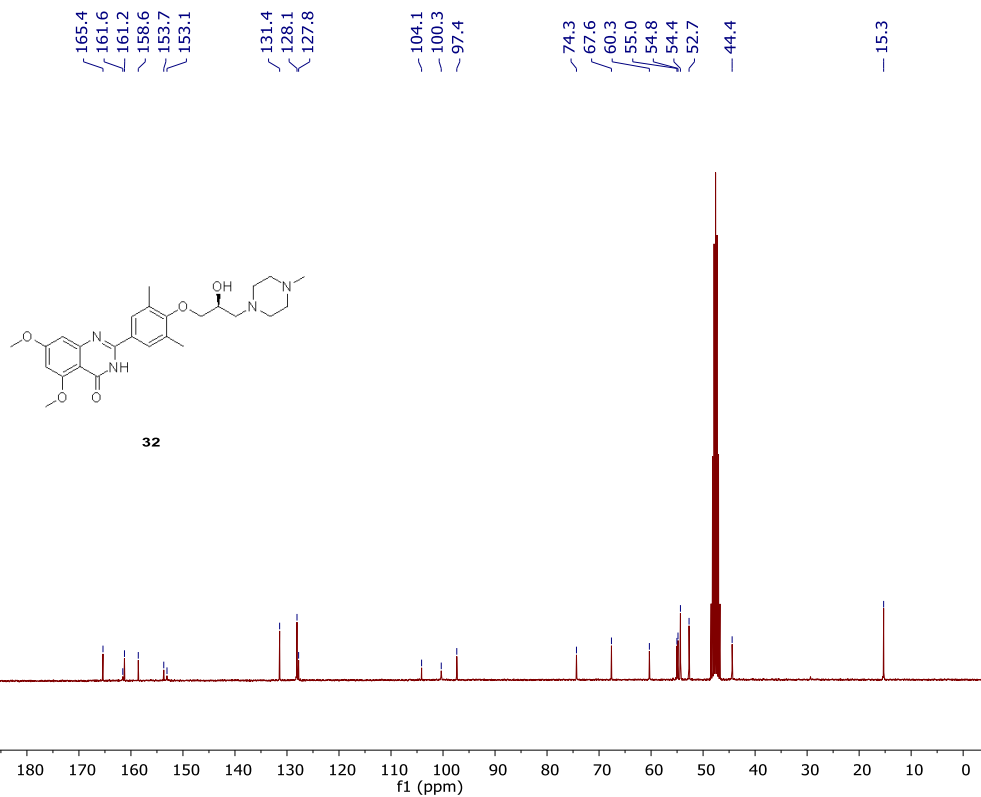

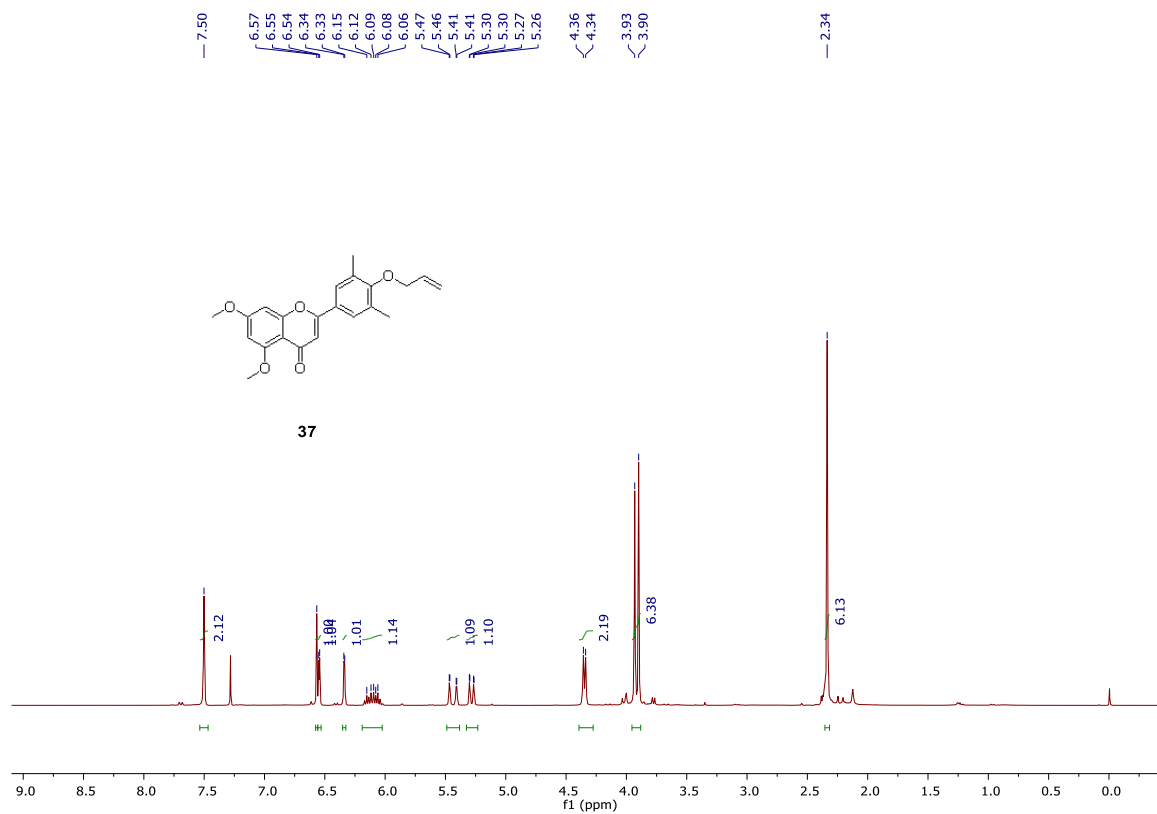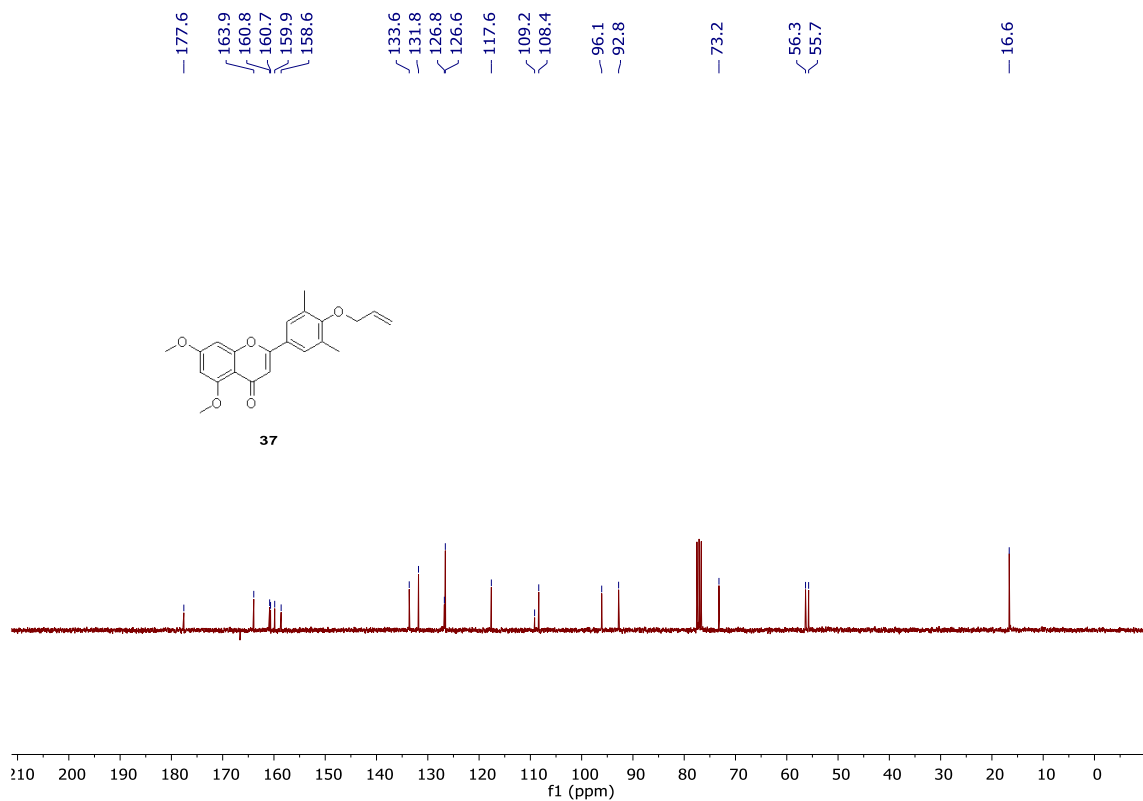

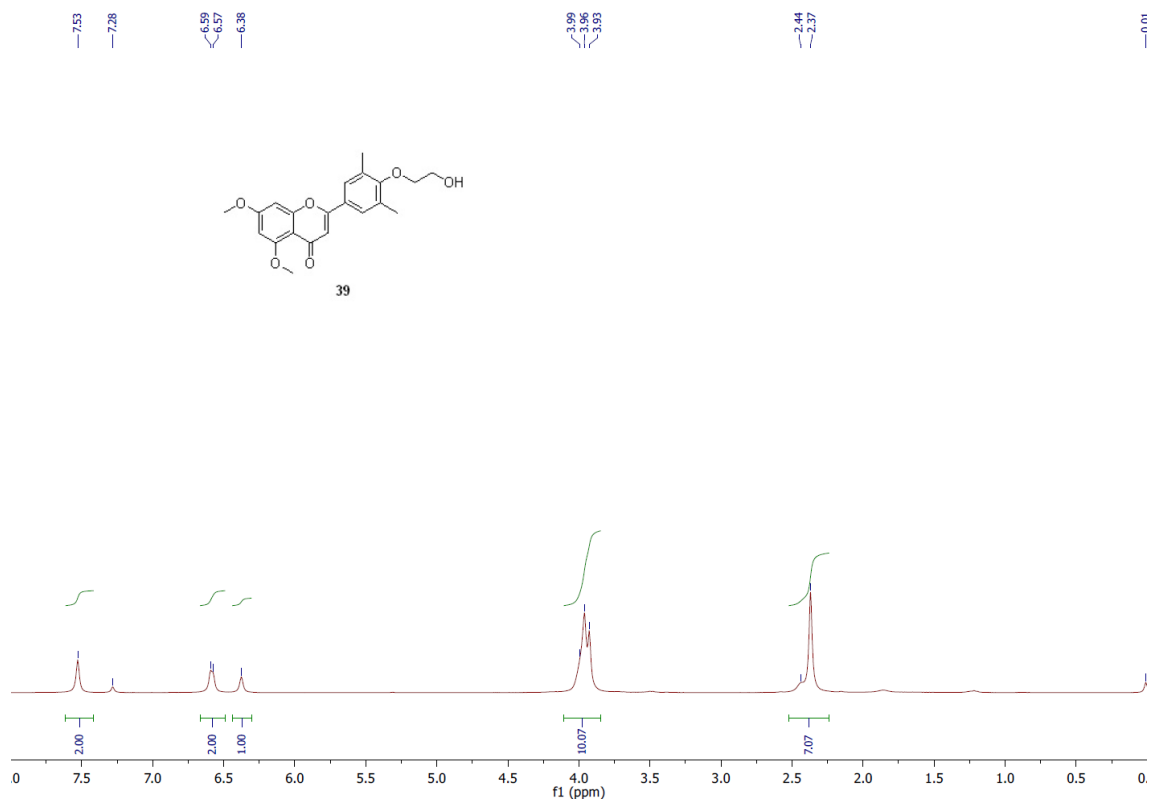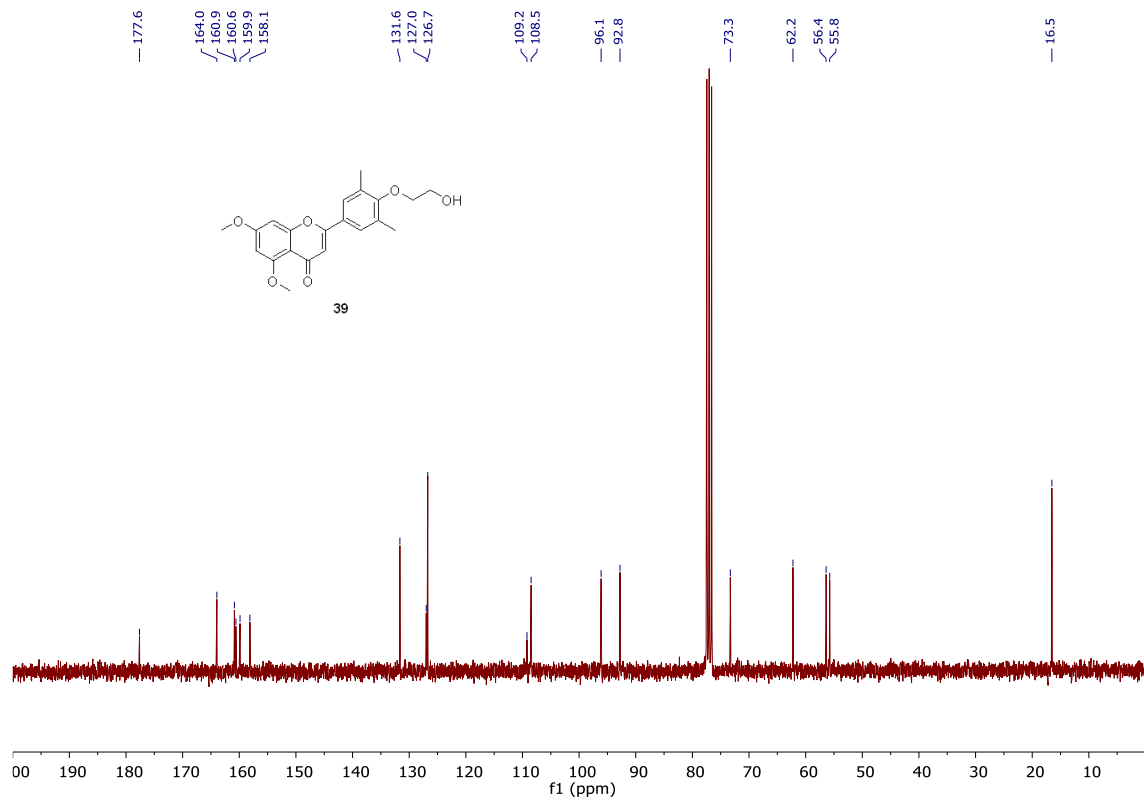

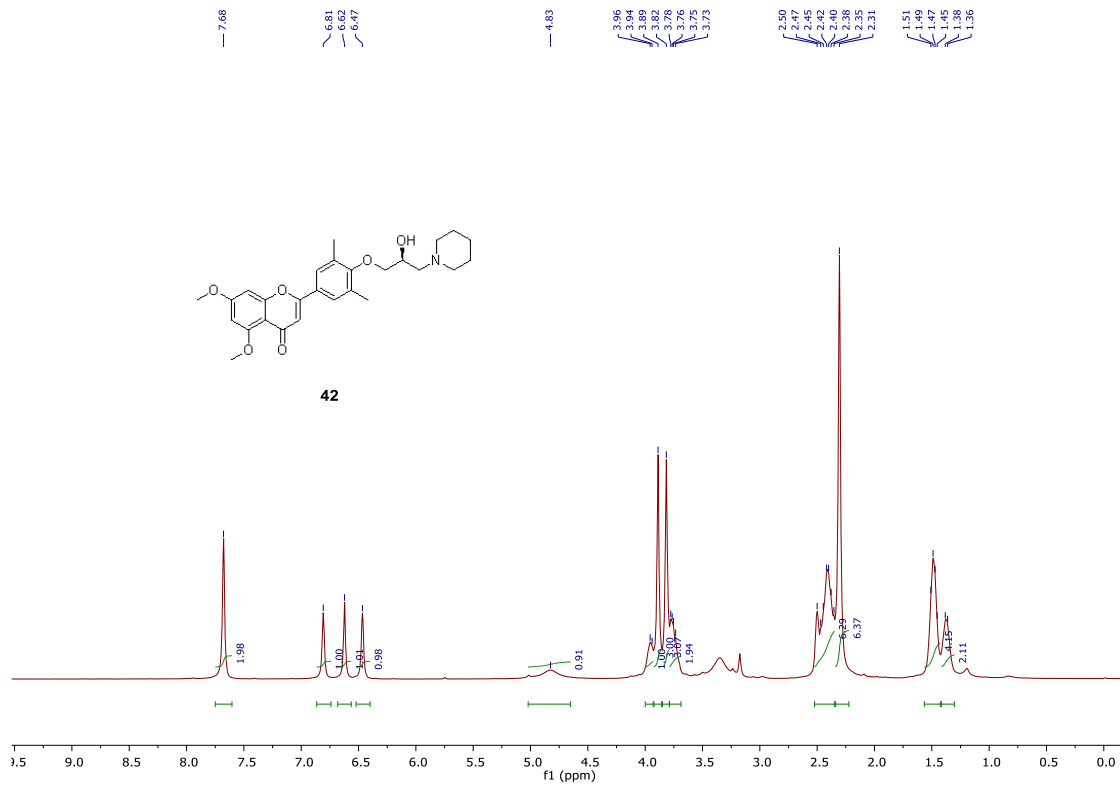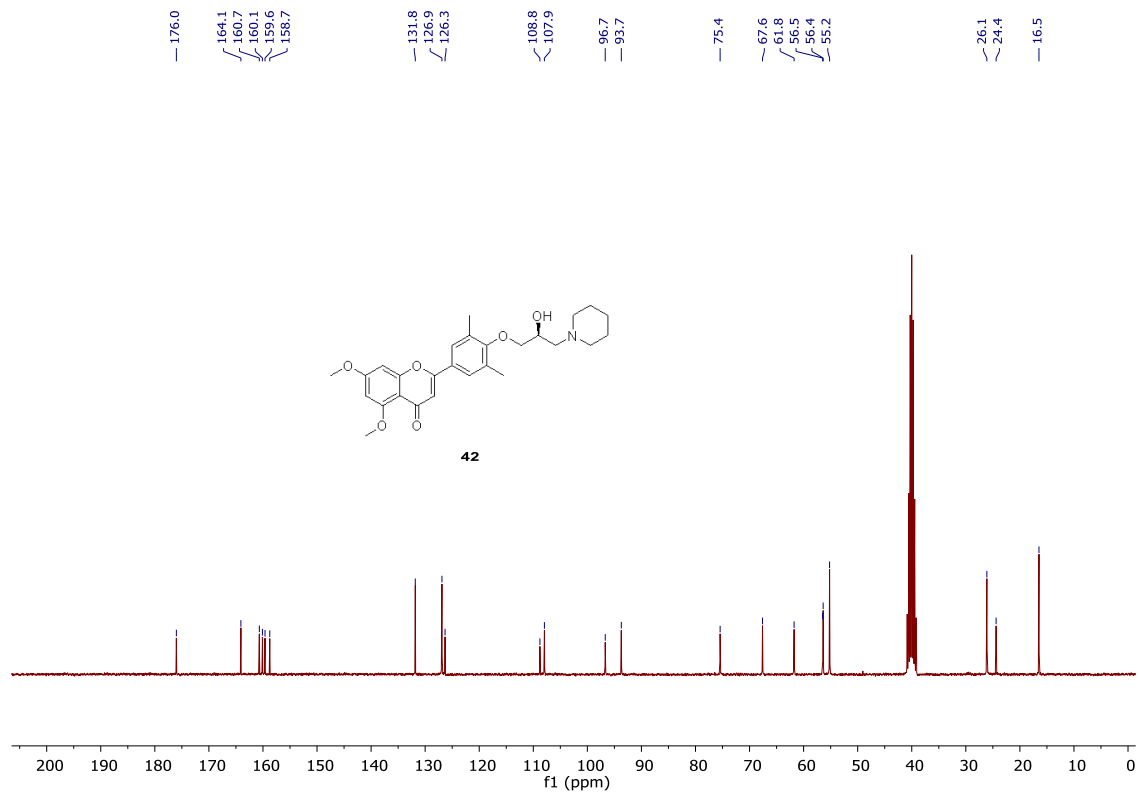

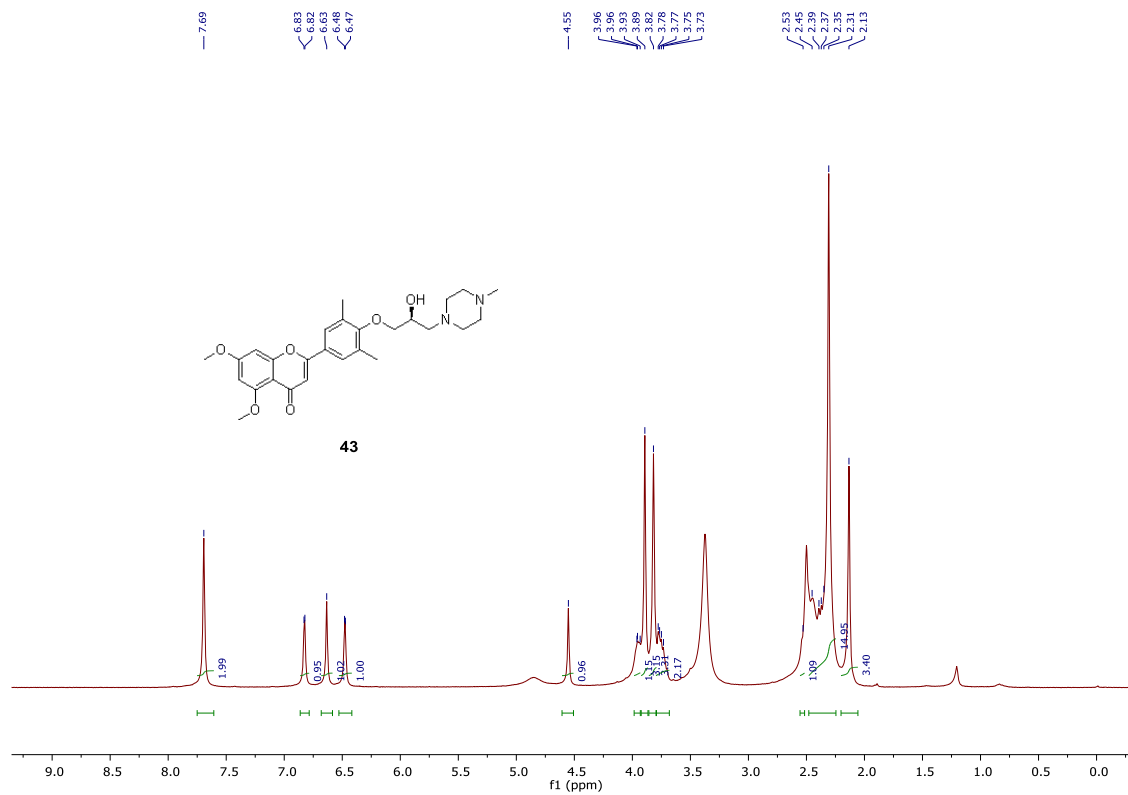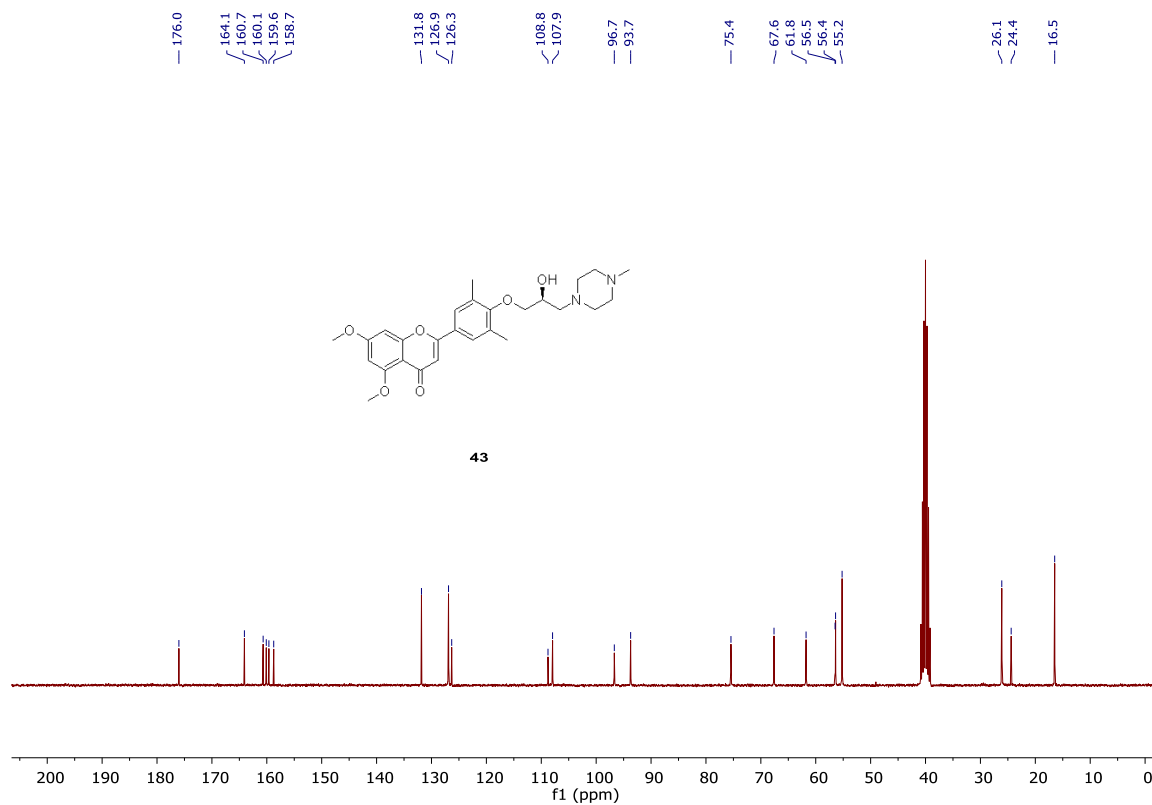

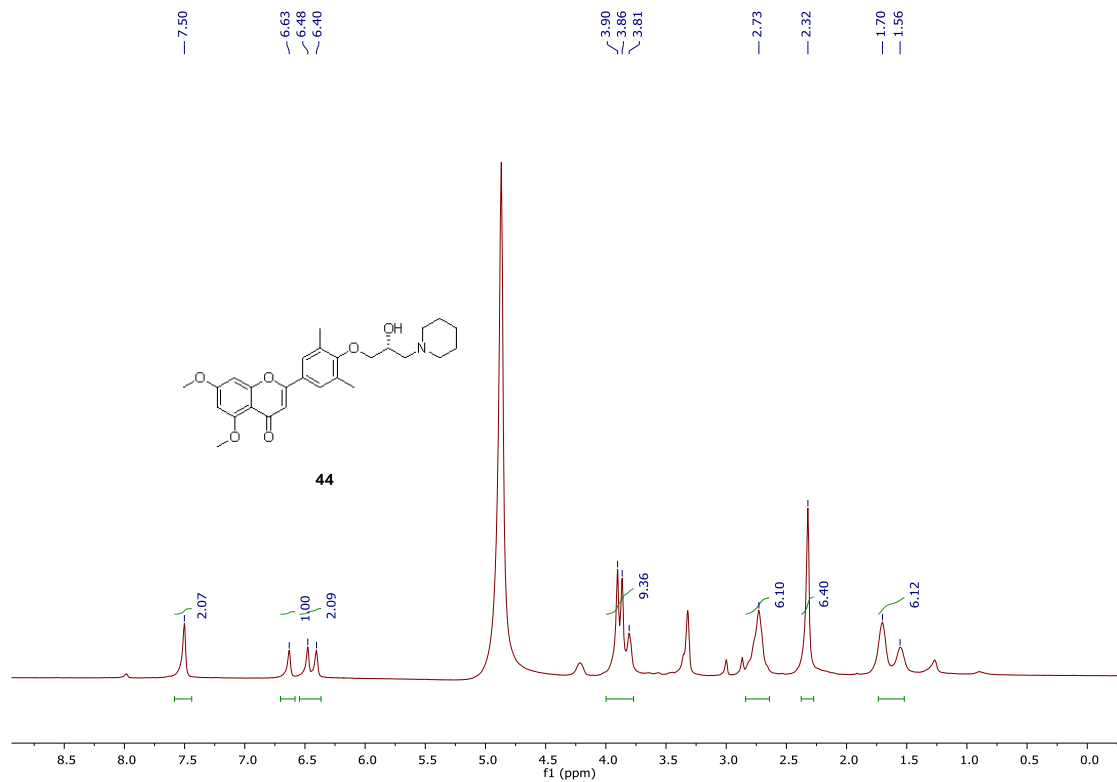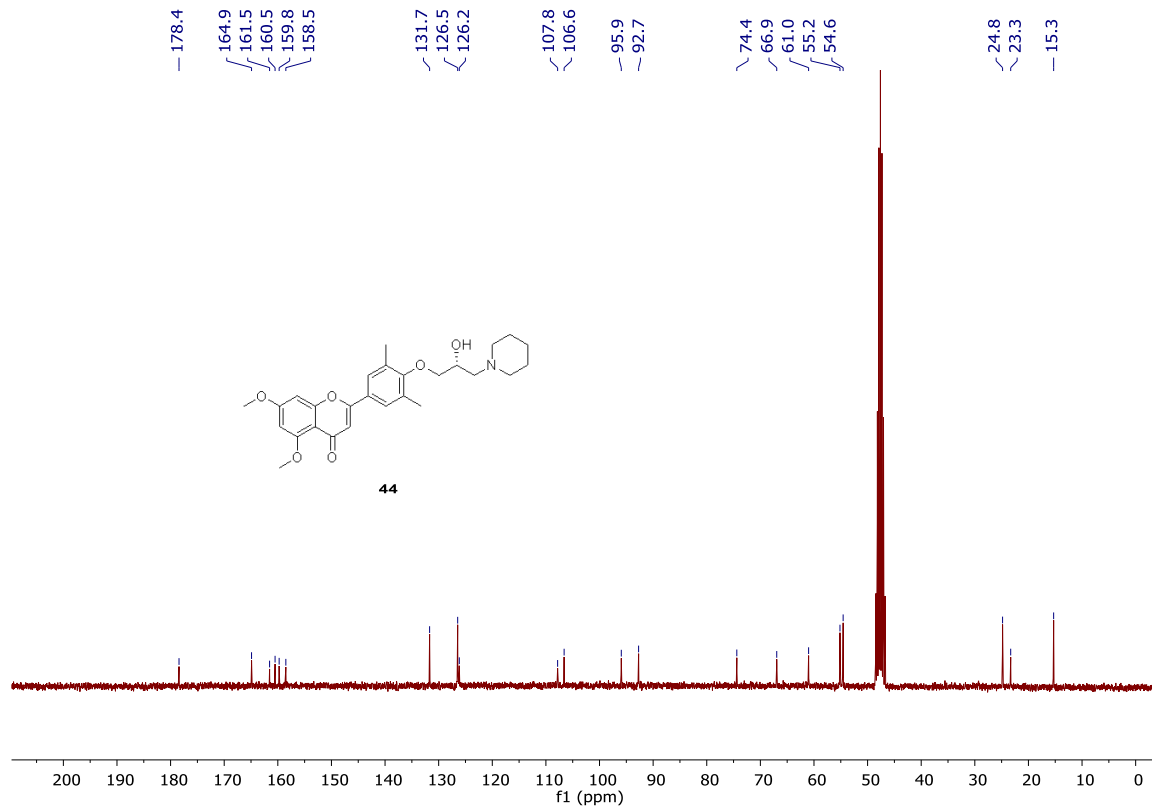

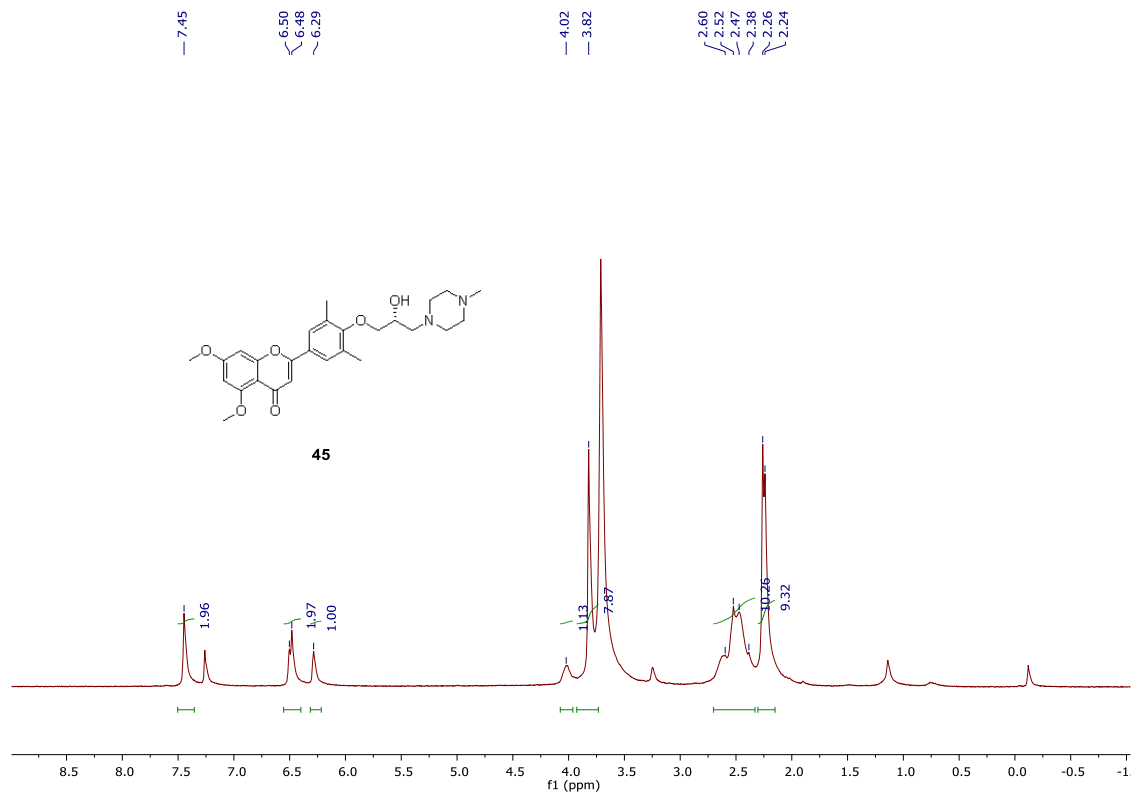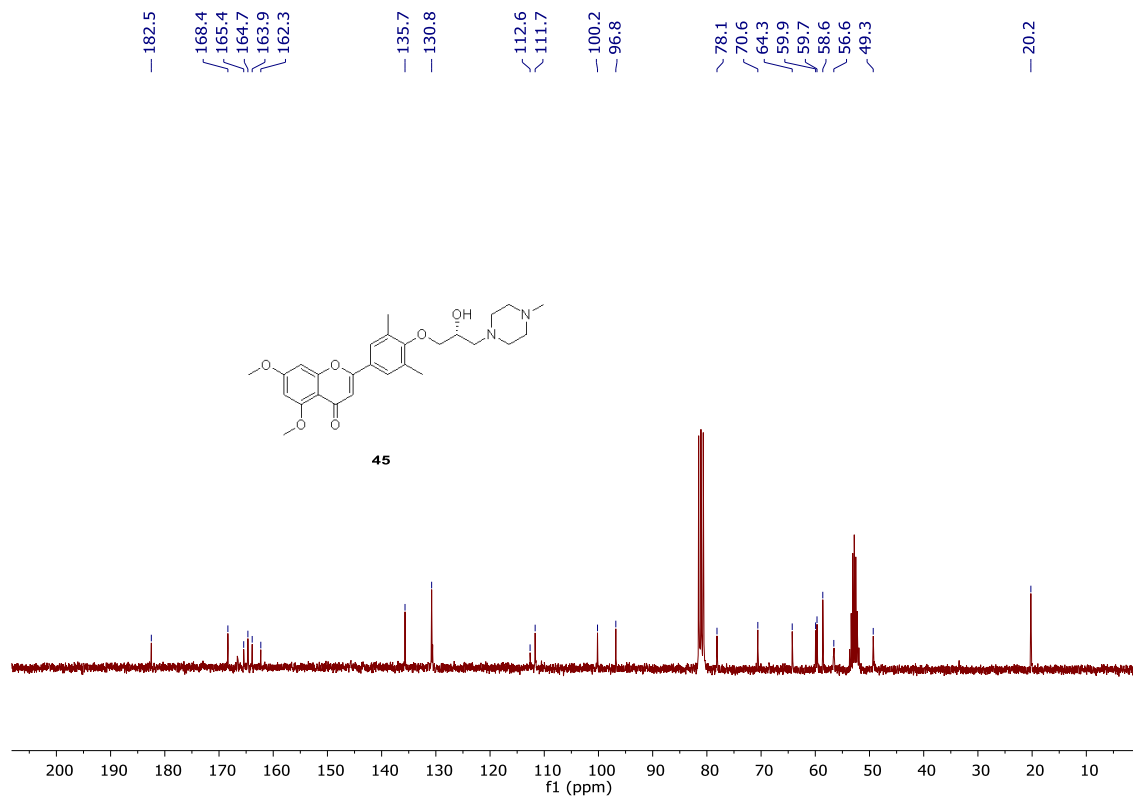

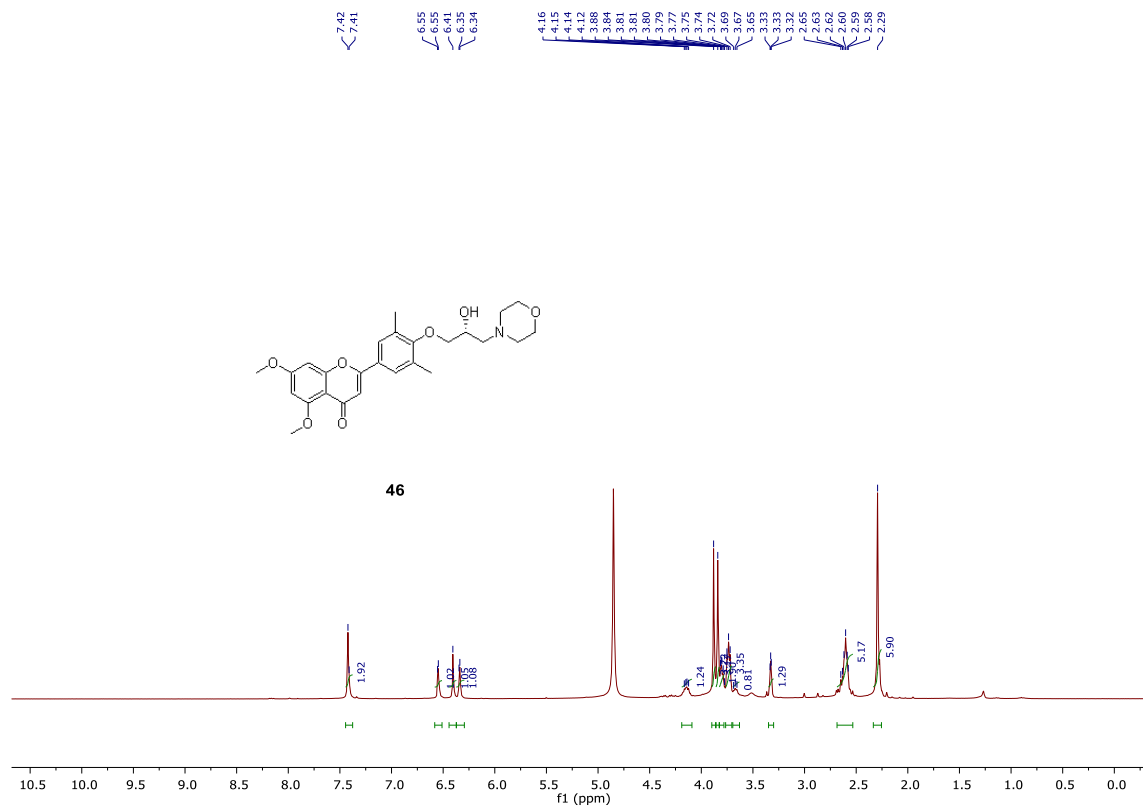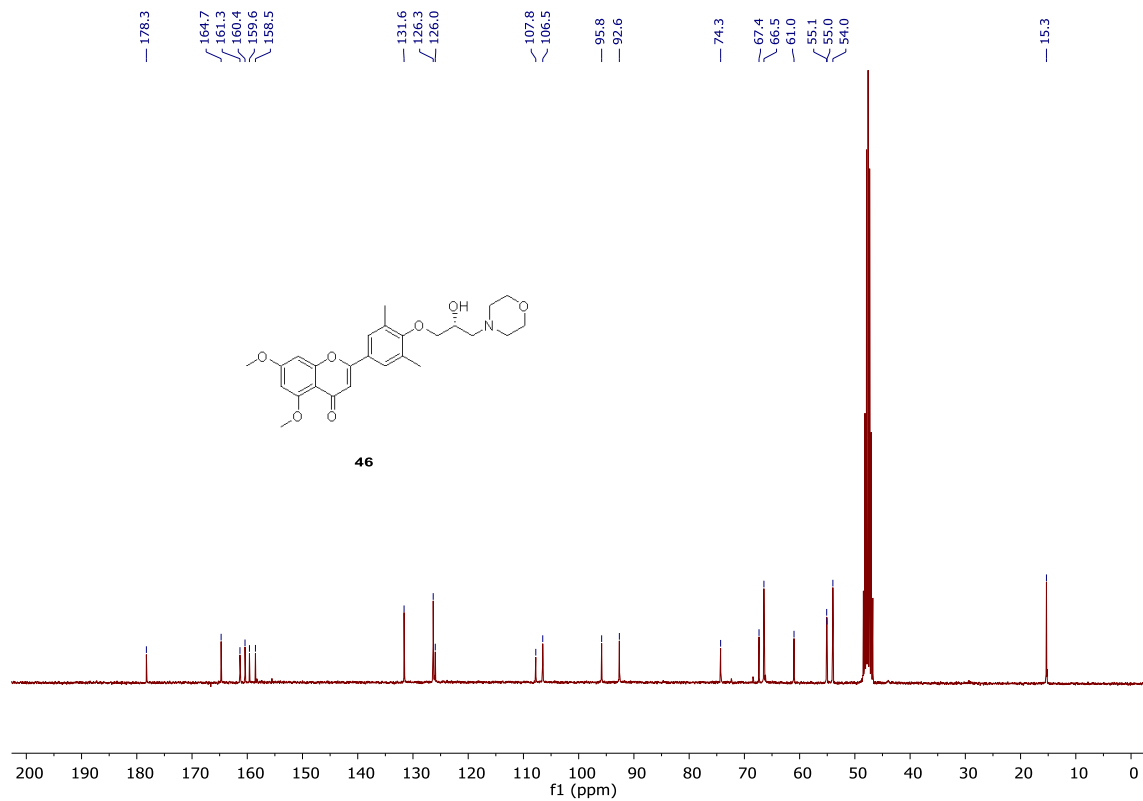



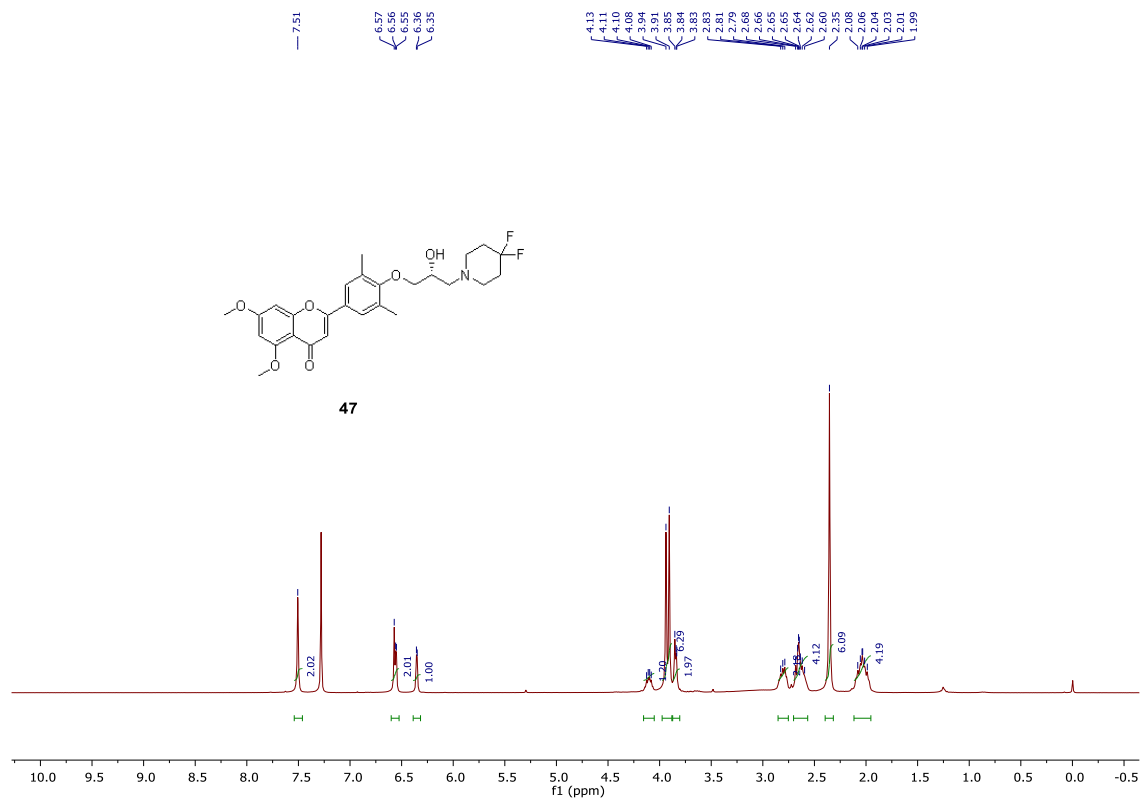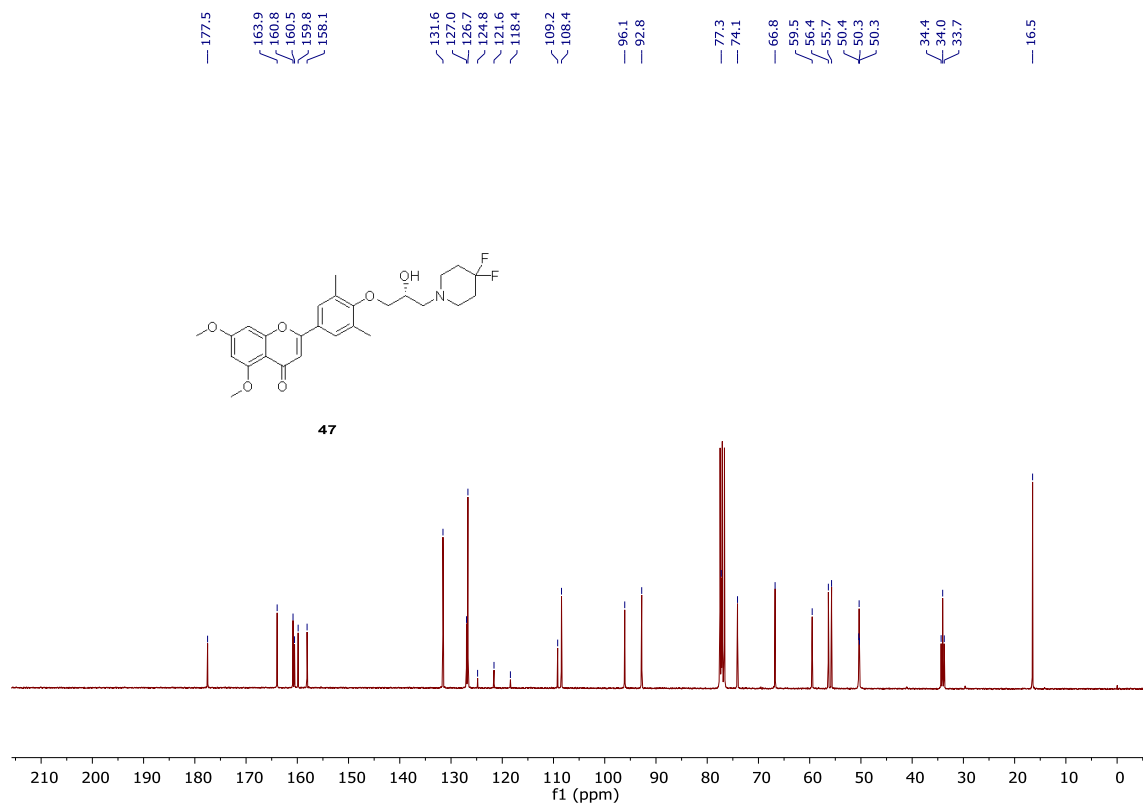

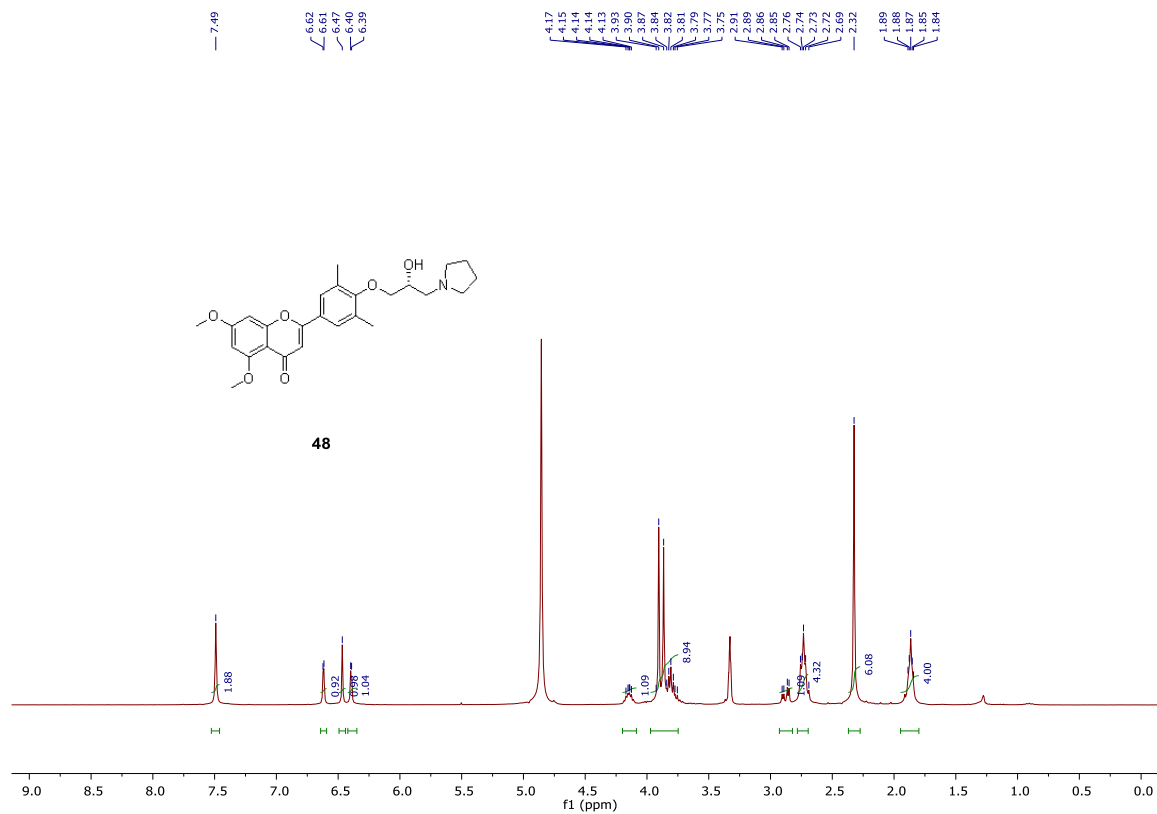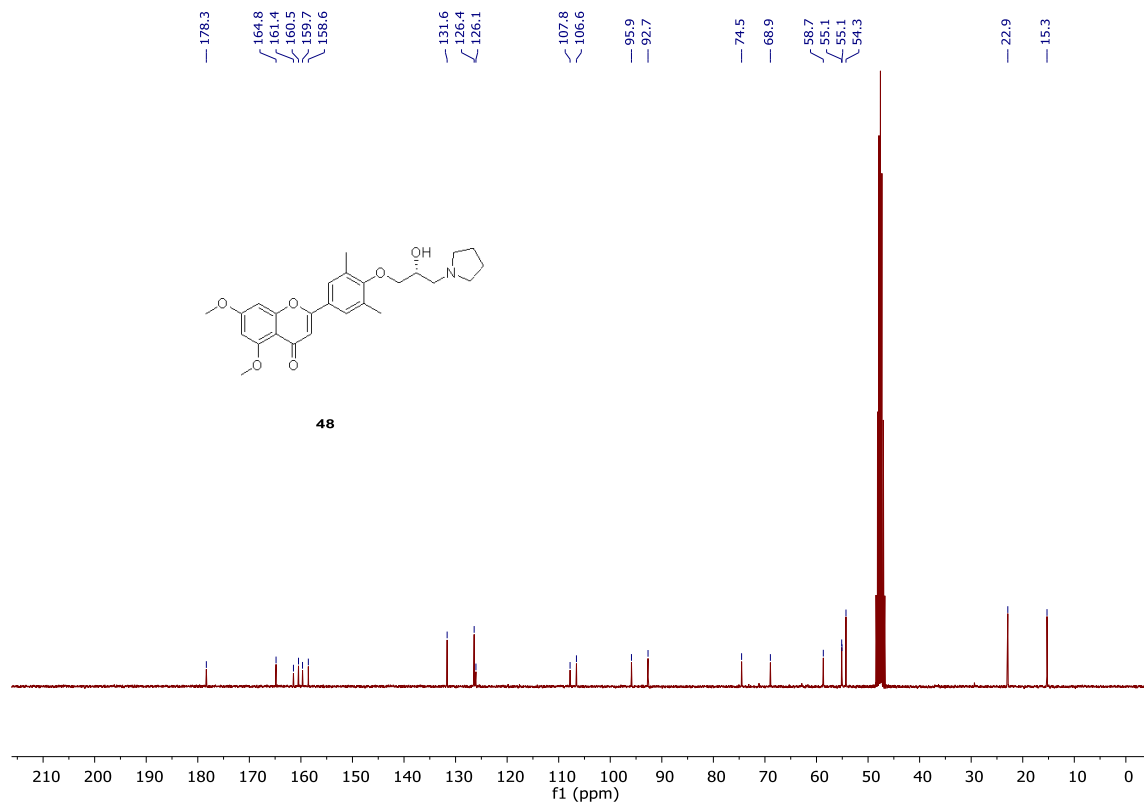

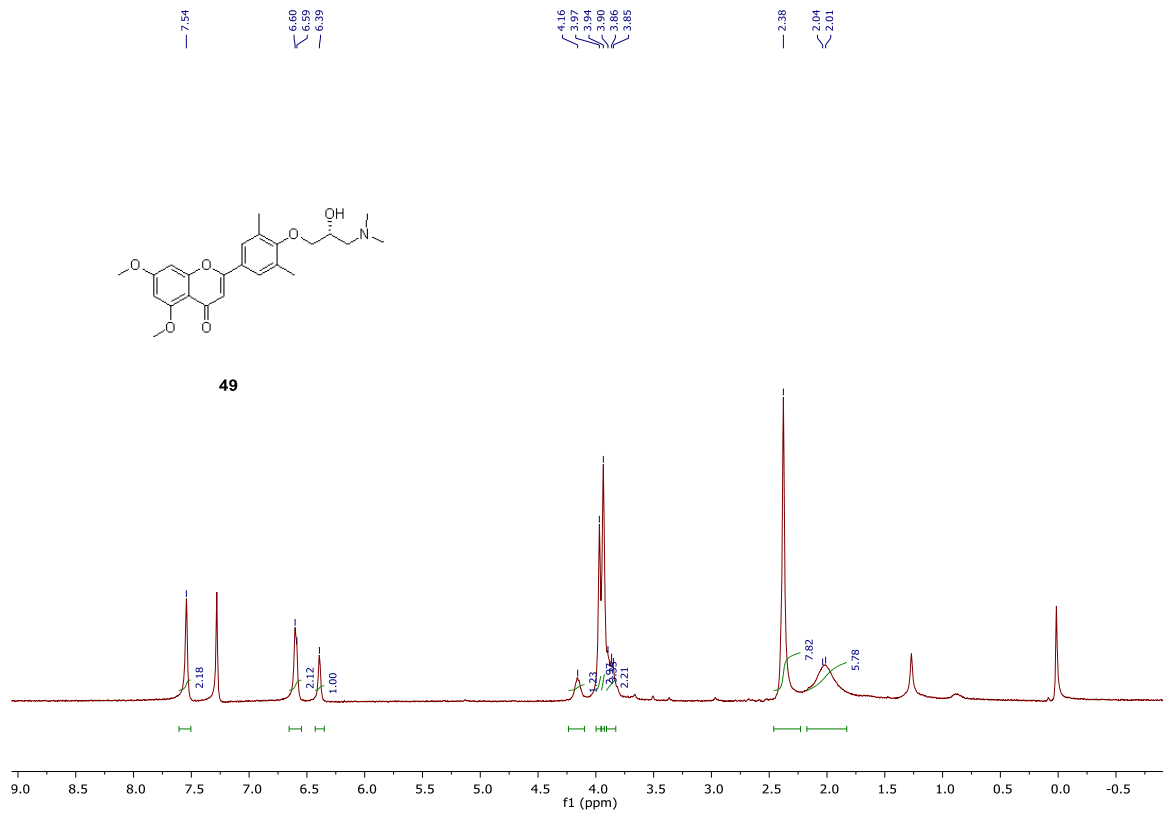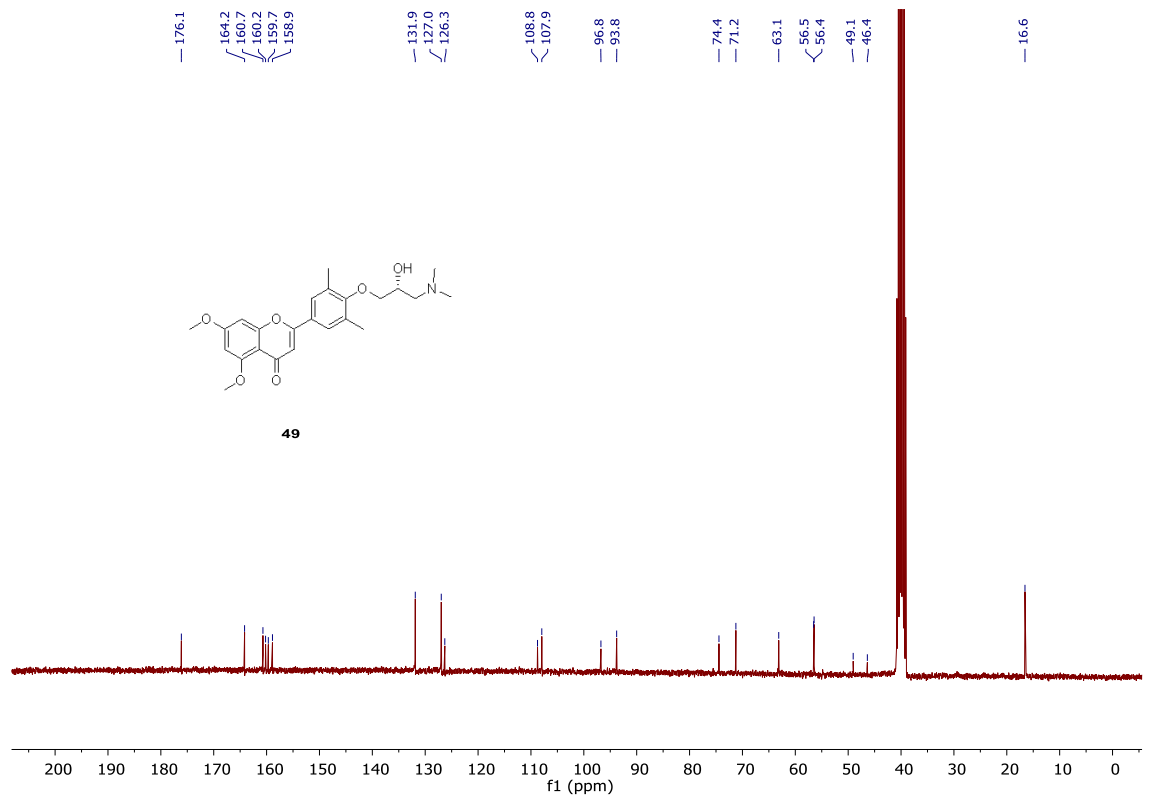

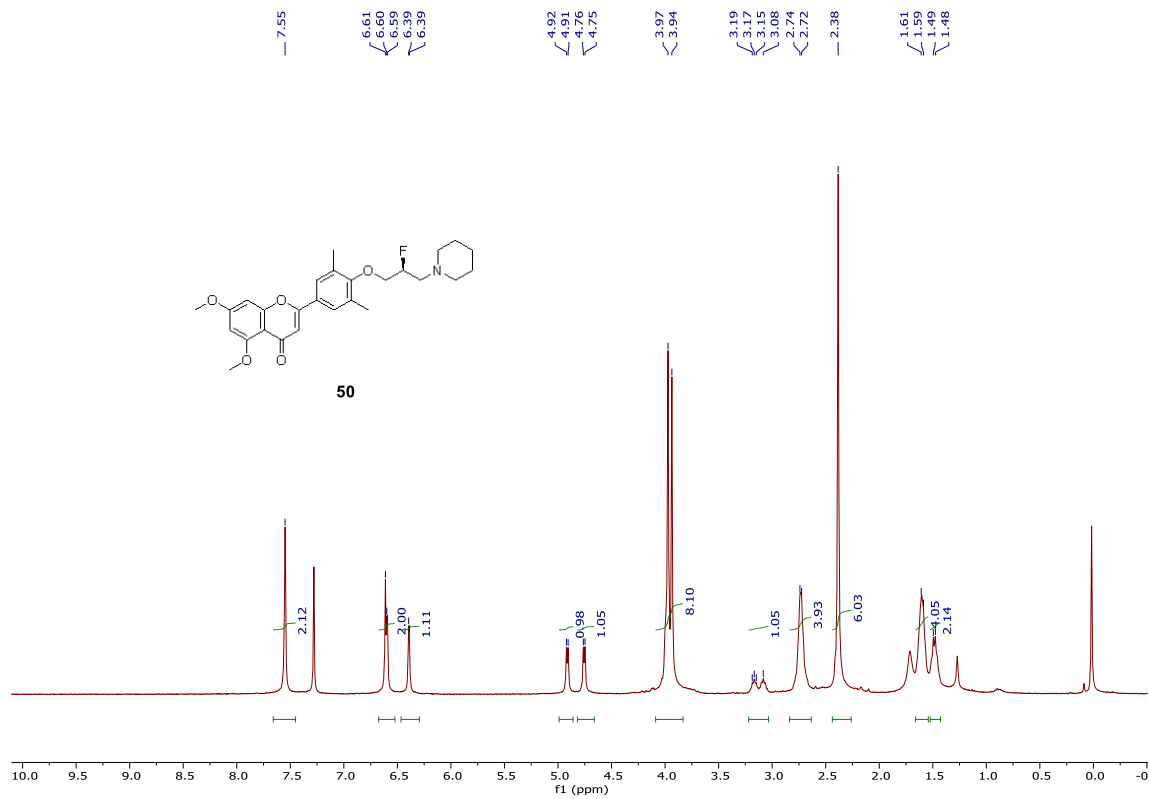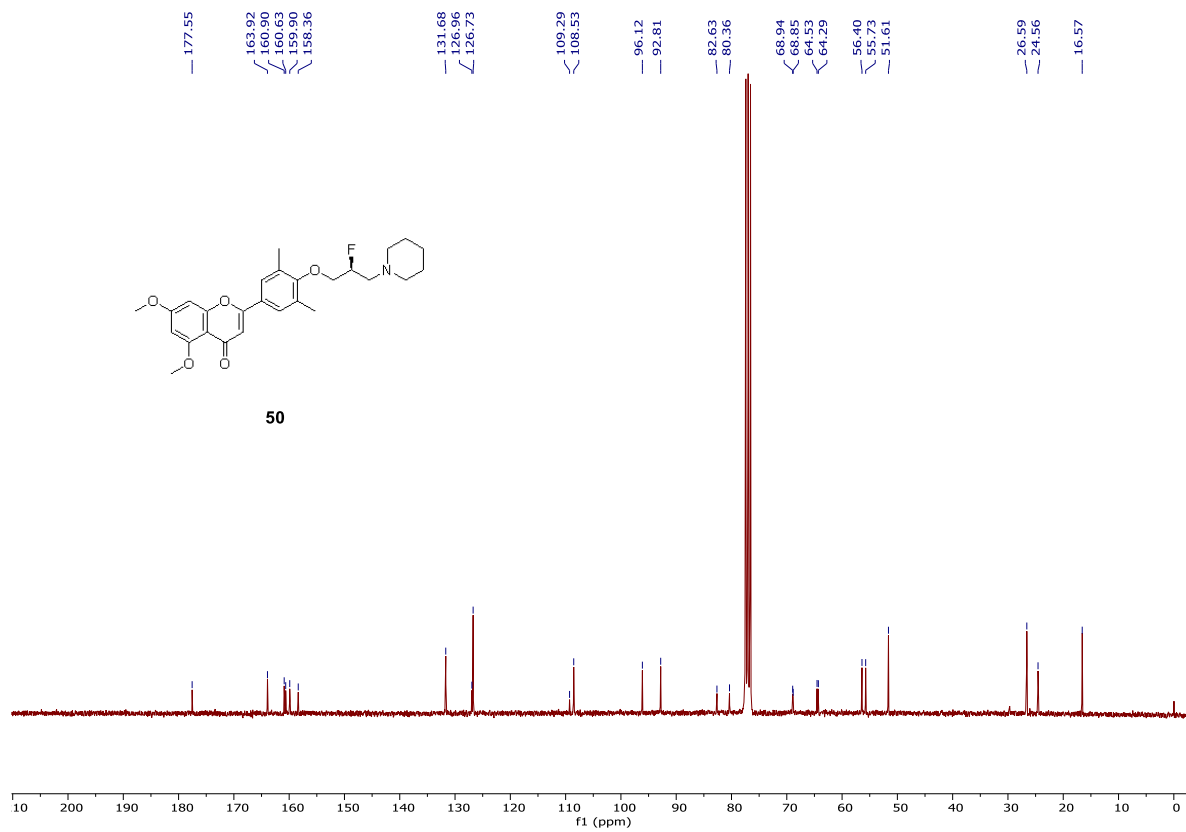

Supplement: NIHMS1679942-supplement-SI.pdf [file NIHMS1679942-supplement-SI.pdf]
